# Supplementary material for: Differences between carbon suboxide and its heavier congeners as ligands in transition metal complexes: a theoretical study
Source: Royal Society of Chemistry journal article supplement (doi:10.1039/c6nj01961g), 2016-01-01
Supplement: c6nj01961g1.pdf [file c6nj01961g1.pdf]

# Differences between Carbon Suboxide and its Heavier Congeners as Ligands in Transition Metal Complexes: A Theoretical Study

Zhong Zhang,<sup>\*,§a</sup> Liang Pu,<sup>§a</sup> Xiao Zhao,<sup>a</sup> Qian-shu Li,<sup>b</sup> R. Bruce King,<sup>\*,c</sup>

<sup>a</sup> College of Science, Northwest A&F University, Yangling, Shanxi 712100, P. R. China

<sup>b</sup> School of Chemistry and Environment, South China Normal University, Key Laboratory of Theoretical Chemistry of Environment, Ministry of Education, Guangzhou, China 510006

<sup>c</sup> Department of Chemistry and Center for Computational Chemistry, University of Georgia, Athens, Georgia 30602, USA

§ These authors contributed equally to this work

## Supplementary Material

**Tables S1-S23:** The theoretical Cartesian coordinates for local minima structures (23 structures);

**Complete Gaussian 09 reference (Reference 45)**

**Table S1.** The theoretical Cartesian coordinates (in Å) for the structure **Ir10-I** using the M06L/DZP method

Standard orientation:

| Center<br>Number<br>Z | Atomic<br>Number | Atomic<br>Type | Coordinates (Angstroms) |           |           |
|-----------------------|------------------|----------------|-------------------------|-----------|-----------|
|                       |                  |                | X                       | Y         | Z         |
| 1                     | 15               | 0              | 1.279120                | 1.898802  | 0.041580  |
| 2                     | 15               | 0              | -2.049084               | 1.038601  | -0.494049 |
| 3                     | 15               | 0              | -0.954613               | -0.648535 | 1.968828  |
| 4                     | 15               | 0              | 2.088821                | -1.125783 | 0.176569  |
| 5                     | 6                | 0              | 3.240181                | 0.107773  | 0.893486  |
| 6                     | 1                | 0              | 2.980707                | 0.220131  | 1.954984  |
| 7                     | 1                | 0              | 4.275523                | -0.248280 | 0.847624  |
| 8                     | 6                | 0              | 3.061808                | 1.423071  | 0.149717  |
| 9                     | 1                | 0              | 3.424543                | 1.326053  | -0.881945 |
| 10                    | 1                | 0              | 3.637078                | 2.233772  | 0.610117  |
| 11                    | 6                | 0              | -2.899223               | 1.166804  | 1.129690  |
| 12                    | 1                | 0              | -2.444117               | 2.007397  | 1.670702  |
| 13                    | 1                | 0              | -3.957056               | 1.415583  | 0.985725  |
| 14                    | 6                | 0              | -2.727489               | -0.131289 | 1.905228  |
| 15                    | 1                | 0              | -3.277183               | -0.943172 | 1.411678  |
| 16                    | 1                | 0              | -3.135234               | -0.049984 | 2.919182  |
| 17                    | 77               | 0              | 0.022161                | -0.041409 | -0.151673 |
| 18                    | 6                | 0              | 0.135045                | -0.420572 | -2.194988 |
| 19                    | 6                | 0              | -0.459783               | -1.546377 | -1.603673 |
| 20                    | 6                | 0              | -1.110521               | -2.639744 | -1.851313 |
| 21                    | 6                | 0              | -2.142059               | 2.722278  | -1.171936 |
| 22                    | 1                | 0              | -1.607509               | 3.427939  | -0.528466 |
| 23                    | 1                | 0              | -1.692982               | 2.748656  | -2.168863 |
| 24                    | 1                | 0              | -3.183539               | 3.048636  | -1.248851 |
| 25                    | 6                | 0              | -3.211737               | 0.116331  | -1.543828 |
| 26                    | 1                | 0              | -3.365666               | -0.891346 | -1.148966 |
| 27                    | 1                | 0              | -4.174134               | 0.633433  | -1.602912 |
| 28                    | 1                | 0              | -2.802402               | 0.012728  | -2.552206 |
| 29                    | 6                | 0              | -1.122772               | -2.416703 | 2.389065  |
| 30                    | 1                | 0              | -1.842201               | -2.561600 | 3.201542  |
| 31                    | 1                | 0              | -1.464216               | -2.972272 | 1.510549  |
| 32                    | 1                | 0              | -0.165793               | -2.839032 | 2.703973  |
| 33                    | 6                | 0              | -0.372651               | 0.078302  | 3.541891  |
| 34                    | 1                | 0              | 0.687414                | -0.146128 | 3.699024  |
| 35                    | 1                | 0              | -0.480389               | 1.166390  | 3.507406  |

|    |   |   |           |           |           |
|----|---|---|-----------|-----------|-----------|
| 36 | 1 | 0 | -0.937371 | -0.301390 | 4.399669  |
| 37 | 6 | 0 | 1.070418  | 3.040097  | 1.452418  |
| 38 | 1 | 0 | 0.037247  | 3.395833  | 1.516567  |
| 39 | 1 | 0 | 1.305644  | 2.523470  | 2.387934  |
| 40 | 1 | 0 | 1.728179  | 3.910322  | 1.358826  |
| 41 | 6 | 0 | 1.294087  | 3.004586  | -1.404788 |
| 42 | 1 | 0 | 0.418252  | 3.656053  | -1.418794 |
| 43 | 1 | 0 | 2.185679  | 3.639314  | -1.392501 |
| 44 | 1 | 0 | 1.289190  | 2.400872  | -2.317962 |
| 45 | 6 | 0 | 2.881821  | -1.674488 | -1.362993 |
| 46 | 1 | 0 | 2.972618  | -0.842089 | -2.065978 |
| 47 | 1 | 0 | 3.871025  | -2.099789 | -1.170136 |
| 48 | 1 | 0 | 2.254955  | -2.432674 | -1.840175 |
| 49 | 6 | 0 | 2.234511  | -2.578245 | 1.256369  |
| 50 | 1 | 0 | 3.255161  | -2.971800 | 1.236678  |
| 51 | 1 | 0 | 1.987343  | -2.317098 | 2.289312  |
| 52 | 1 | 0 | 1.552945  | -3.364322 | 0.919934  |
| 53 | 8 | 0 | -1.703495 | -3.645789 | -2.012816 |
| 54 | 8 | 0 | 0.486794  | 0.076497  | -3.239037 |

---

**Table S2.** The theoretical Cartesian coordinates (in Å) for the structure **Ir1O-II** using the M06L/DZP method

Standard orientation:

| Center<br>Number | Atomic<br>Number | Atomic<br>Type | Coordinates (Angstroms) |           |           |
|------------------|------------------|----------------|-------------------------|-----------|-----------|
|                  |                  |                | X                       | Y         | Z         |
| 1                | 15               | 0              | 2.461996                | 0.422691  | 0.014056  |
| 2                | 15               | 0              | -0.582690               | 2.274688  | -0.523331 |
| 3                | 15               | 0              | -0.951200               | 0.188933  | 1.787611  |
| 4                | 15               | 0              | 0.723867                | -2.236332 | -0.087112 |
| 5                | 6                | 0              | 2.438991                | -2.319552 | 0.566115  |
| 6                | 1                | 0              | 2.383874                | -2.188165 | 1.655338  |
| 7                | 1                | 0              | 2.863942                | -3.314173 | 0.388901  |
| 8                | 6                | 0              | 3.288879                | -1.228530 | -0.071995 |
| 9                | 1                | 0              | 3.444975                | -1.447847 | -1.136249 |
| 10               | 1                | 0              | 4.283665                | -1.176343 | 0.384759  |
| 11               | 6                | 0              | -1.189431               | 2.872973  | 1.100519  |
| 12               | 1                | 0              | -0.310397               | 3.175537  | 1.685165  |
| 13               | 1                | 0              | -1.816300               | 3.762860  | 0.977814  |
| 14               | 6                | 0              | -1.937691               | 1.746555  | 1.798179  |
| 15               | 1                | 0              | -2.875799               | 1.522782  | 1.272407  |
| 16               | 1                | 0              | -2.206434               | 2.011900  | 2.826907  |
| 17               | 77               | 0              | 0.090997                | 0.033199  | -0.235977 |
| 18               | 6                | 0              | -1.362626               | -0.575182 | -1.612625 |
| 19               | 6                | 0              | -2.614681               | -1.059358 | -1.731657 |
| 20               | 6                | 0              | -3.612677               | -1.319407 | -0.950187 |
| 21               | 6                | 0              | 3.158233                | 1.157007  | 1.536260  |
| 22               | 1                | 0              | 2.910528                | 0.533906  | 2.400208  |
| 23               | 1                | 0              | 4.247254                | 1.249670  | 1.473090  |
| 24               | 1                | 0              | 2.736191                | 2.152221  | 1.710730  |
| 25               | 6                | 0              | 3.345160                | 1.329631  | -1.300354 |
| 26               | 1                | 0              | 2.993249                | 0.994201  | -2.279990 |
| 27               | 1                | 0              | 3.161101                | 2.403984  | -1.224540 |
| 28               | 1                | 0              | 4.425501                | 1.164277  | -1.234621 |
| 29               | 6                | 0              | -2.206424               | -1.036247 | 2.271441  |
| 30               | 1                | 0              | -1.746839               | -1.968390 | 2.605175  |
| 31               | 1                | 0              | -2.802200               | -0.639488 | 3.099926  |
| 32               | 1                | 0              | -2.875287               | -1.258056 | 1.436319  |
| 33               | 6                | 0              | 0.071947                | 0.312144  | 3.292372  |
| 34               | 1                | 0              | -0.549251               | 0.393421  | 4.190039  |
| 35               | 1                | 0              | 0.702591                | -0.577694 | 3.389582  |
| 36               | 1                | 0              | 0.728437                | 1.185229  | 3.238283  |

|    |   |   |           |           |           |
|----|---|---|-----------|-----------|-----------|
| 37 | 6 | 0 | -0.194167 | -3.454493 | 0.897468  |
| 38 | 1 | 0 | -0.141093 | -3.208221 | 1.961601  |
| 39 | 1 | 0 | -1.243341 | -3.468068 | 0.590259  |
| 40 | 1 | 0 | 0.225610  | -4.454450 | 0.754759  |
| 41 | 6 | 0 | 0.592076  | 3.549162  | -1.066097 |
| 42 | 1 | 0 | 1.422473  | 3.633806  | -0.358956 |
| 43 | 1 | 0 | 0.993716  | 3.290521  | -2.049348 |
| 44 | 1 | 0 | 0.099093  | 4.523148  | -1.139428 |
| 45 | 6 | 0 | -1.971757 | 2.468184  | -1.675476 |
| 46 | 1 | 0 | -1.685120 | 2.083880  | -2.657926 |
| 47 | 1 | 0 | -2.827896 | 1.878421  | -1.337332 |
| 48 | 1 | 0 | -2.263689 | 3.518232  | -1.769058 |
| 49 | 6 | 0 | 0.803751  | -2.995198 | -1.735145 |
| 50 | 1 | 0 | 1.253821  | -3.991196 | -1.681936 |
| 51 | 1 | 0 | -0.205780 | -3.078973 | -2.146226 |
| 52 | 1 | 0 | 1.375982  | -2.364424 | -2.419530 |
| 53 | 8 | 0 | -4.611538 | -1.604481 | -0.378654 |
| 54 | 8 | 0 | -0.406770 | -0.312352 | -2.398490 |

---

**Table S3.** The theoretical Cartesian coordinates (in Å) for the structure **Ir1S-I** using the M06L/DZP method

Standard orientation:

| Center<br>Number<br>Z | Atomic<br>Number | Atomic<br>Type | Coordinates (Angstroms) |           |           |
|-----------------------|------------------|----------------|-------------------------|-----------|-----------|
|                       |                  |                | X                       | Y         | Z         |
| 1                     | 15               | 0              | 2.279806                | 0.663855  | 0.347521  |
| 2                     | 15               | 0              | -0.775026               | 2.162565  | -0.509298 |
| 3                     | 15               | 0              | -1.181030               | 0.232474  | 1.985531  |
| 4                     | 15               | 0              | 0.905668                | -2.167652 | 0.384473  |
| 5                     | 6                | 0              | 2.576294                | -1.992281 | 1.122671  |
| 6                     | 1                | 0              | 2.442801                | -1.767457 | 2.189631  |
| 7                     | 1                | 0              | 3.128273                | -2.936640 | 1.060210  |
| 8                     | 6                | 0              | 3.313964                | -0.860478 | 0.422422  |
| 9                     | 1                | 0              | 3.541350                | -1.132891 | -0.616786 |
| 10                    | 1                | 0              | 4.271481                | -0.637418 | 0.906720  |
| 11                    | 6                | 0              | -1.515446               | 2.830862  | 1.032940  |
| 12                    | 1                | 0              | -0.699744               | 3.233502  | 1.649012  |
| 13                    | 1                | 0              | -2.180318               | 3.670140  | 0.798987  |
| 14                    | 6                | 0              | -2.251762               | 1.720123  | 1.767734  |
| 15                    | 1                | 0              | -3.126975               | 1.395833  | 1.188799  |
| 16                    | 1                | 0              | -2.626242               | 2.059598  | 2.740197  |
| 17                    | 77               | 0              | 0.087582                | 0.007200  | -0.041661 |
| 18                    | 6                | 0              | 0.116354                | -0.344583 | -2.105320 |
| 19                    | 6                | 0              | -1.107389               | -0.815304 | -1.694465 |
| 20                    | 6                | 0              | -2.300694               | -1.265682 | -1.533199 |
| 21                    | 6                | 0              | 0.276446                | 3.514199  | -1.115242 |
| 22                    | 1                | 0              | 1.047386                | 3.766123  | -0.381153 |
| 23                    | 1                | 0              | 0.760469                | 3.224343  | -2.051793 |
| 24                    | 1                | 0              | -0.327079               | 4.408375  | -1.298129 |
| 25                    | 6                | 0              | -2.143825               | 2.143048  | -1.703392 |
| 26                    | 1                | 0              | -2.923533               | 1.444623  | -1.387857 |
| 27                    | 1                | 0              | -2.572016               | 3.143946  | -1.811427 |
| 28                    | 1                | 0              | -1.778904               | 1.804428  | -2.676790 |
| 29                    | 6                | 0              | -2.425468               | -1.023594 | 2.436085  |
| 30                    | 1                | 0              | -3.142227               | -0.608390 | 3.151718  |
| 31                    | 1                | 0              | -2.969018               | -1.356005 | 1.545288  |
| 32                    | 1                | 0              | -1.957712               | -1.896788 | 2.895999  |
| 33                    | 6                | 0              | -0.364592               | 0.550298  | 3.591239  |
| 34                    | 1                | 0              | 0.313126                | -0.272076 | 3.842919  |
| 35                    | 1                | 0              | 0.228175                | 1.468603  | 3.544992  |

|    |    |   |           |           |           |
|----|----|---|-----------|-----------|-----------|
| 36 | 1  | 0 | -1.098541 | 0.649251  | 4.397720  |
| 37 | 6  | 0 | 2.697701  | 1.553240  | 1.885937  |
| 38 | 1  | 0 | 2.122325  | 2.482892  | 1.948723  |
| 39 | 1  | 0 | 2.448059  | 0.944420  | 2.759930  |
| 40 | 1  | 0 | 3.762838  | 1.803588  | 1.922924  |
| 41 | 6  | 0 | 3.134727  | 1.620580  | -0.937748 |
| 42 | 1  | 0 | 2.890786  | 2.682585  | -0.873329 |
| 43 | 1  | 0 | 4.218324  | 1.512672  | -0.828377 |
| 44 | 1  | 0 | 2.830813  | 1.247221  | -1.923672 |
| 45 | 6  | 0 | 1.145138  | -3.180422 | -1.102497 |
| 46 | 1  | 0 | 1.779900  | -2.657030 | -1.822166 |
| 47 | 1  | 0 | 1.594932  | -4.144897 | -0.849142 |
| 48 | 1  | 0 | 0.180723  | -3.354283 | -1.587436 |
| 49 | 6  | 0 | 0.030917  | -3.289542 | 1.513554  |
| 50 | 1  | 0 | 0.545510  | -4.253116 | 1.575153  |
| 51 | 1  | 0 | -0.018956 | -2.858473 | 2.517826  |
| 52 | 1  | 0 | -0.988796 | -3.462433 | 1.157320  |
| 53 | 16 | 0 | 1.014802  | -0.121080 | -3.438558 |
| 54 | 16 | 0 | -3.763331 | -1.784548 | -1.254307 |

---

**Table S4.** The theoretical Cartesian coordinates (in Å) for the structure **Ir1S-II** using the M06L/DZP method

Standard orientation:

| Center<br>Number | Atomic<br>Number | Atomic<br>Type | Coordinates (Angstroms) |           |           |
|------------------|------------------|----------------|-------------------------|-----------|-----------|
|                  |                  |                | X                       | Y         | Z         |
| 1                | 15               | 0              | 2.657244                | -0.120931 | -0.018082 |
| 2                | 15               | 0              | 0.140060                | 2.368891  | -0.444255 |
| 3                | 15               | 0              | -0.563763               | 0.413330  | 1.912550  |
| 4                | 15               | 0              | 0.374769                | -2.337737 | 0.009217  |
| 5                | 6                | 0              | 2.046897                | -2.765272 | 0.640575  |
| 6                | 1                | 0              | 2.053878                | -2.569835 | 1.721700  |
| 7                | 1                | 0              | 2.242600                | -3.835896 | 0.510783  |
| 8                | 6                | 0              | 3.093988                | -1.916016 | -0.067191 |
| 9                | 1                | 0              | 3.155993                | -2.196279 | -1.126665 |
| 10               | 1                | 0              | 4.092508                | -2.072151 | 0.355987  |
| 11               | 6                | 0              | -0.035901               | 3.064794  | 1.242770  |
| 12               | 1                | 0              | 0.954972                | 3.052456  | 1.717309  |
| 13               | 1                | 0              | -0.362218               | 4.109892  | 1.202669  |
| 14               | 6                | 0              | -1.019623               | 2.198032  | 2.014874  |
| 15               | 1                | 0              | -2.026441               | 2.288428  | 1.585248  |
| 16               | 1                | 0              | -1.096142               | 2.500863  | 3.065113  |
| 17               | 77               | 0              | 0.276051                | 0.018484  | -0.210914 |
| 18               | 6                | 0              | -1.460474               | -0.197677 | -1.349532 |
| 19               | 6                | 0              | -2.764044               | -0.329241 | -1.159947 |
| 20               | 6                | 0              | -3.946872               | -0.407295 | -0.688318 |
| 21               | 6                | 0              | 3.575251                | 0.488661  | 1.440545  |
| 22               | 1                | 0              | 3.263805                | -0.053041 | 2.338289  |
| 23               | 1                | 0              | 4.654552                | 0.357521  | 1.313855  |
| 24               | 1                | 0              | 3.375005                | 1.552698  | 1.603140  |
| 25               | 6                | 0              | 3.660997                | 0.518991  | -1.400334 |
| 26               | 1                | 0              | 3.206139                | 0.230335  | -2.351872 |
| 27               | 1                | 0              | 3.723414                | 1.609008  | -1.371812 |
| 28               | 1                | 0              | 4.679501                | 0.119508  | -1.356230 |
| 29               | 6                | 0              | -2.124222               | -0.376711 | 2.412968  |
| 30               | 1                | 0              | -1.964330               | -1.400700 | 2.754723  |
| 31               | 1                | 0              | -2.574598               | 0.188576  | 3.234992  |
| 32               | 1                | 0              | -2.823888               | -0.395928 | 1.571105  |
| 33               | 6                | 0              | 0.510030                | 0.172452  | 3.366986  |
| 34               | 1                | 0              | -0.037336               | 0.367235  | 4.294626  |
| 35               | 1                | 0              | 0.889766                | -0.853745 | 3.400067  |
| 36               | 1                | 0              | 1.368201                | 0.848966  | 3.319045  |



|    |    |   |           |           |           |
|----|----|---|-----------|-----------|-----------|
| 37 | 6  | 0 | -0.765078 | -3.216062 | 1.117741  |
| 38 | 1  | 0 | -0.588125 | -2.931733 | 2.158939  |
| 39 | 1  | 0 | -1.798894 | -2.972462 | 0.857502  |
| 40 | 1  | 0 | -0.627181 | -4.297578 | 1.029955  |
| 41 | 6  | 0 | 1.502029  | 3.300534  | -1.200240 |
| 42 | 1  | 0 | 2.412506  | 3.200869  | -0.601647 |
| 43 | 1  | 0 | 1.700668  | 2.917588  | -2.205051 |
| 44 | 1  | 0 | 1.251816  | 4.362822  | -1.273869 |
| 45 | 6  | 0 | -1.327287 | 2.954212  | -1.335467 |
| 46 | 1  | 0 | -1.295583 | 2.598208  | -2.368535 |
| 47 | 1  | 0 | -2.233765 | 2.546155  | -0.880508 |
| 48 | 1  | 0 | -1.373020 | 4.046916  | -1.331515 |
| 49 | 6  | 0 | 0.213953  | -3.266494 | -1.541341 |
| 50 | 1  | 0 | 0.356033  | -4.335655 | -1.357155 |
| 51 | 1  | 0 | -0.780301 | -3.105633 | -1.965649 |
| 52 | 1  | 0 | 0.939527  | -2.919539 | -2.280216 |
| 53 | 16 | 0 | -0.325339 | -0.153046 | -2.611292 |
| 54 | 16 | 0 | -5.429507 | -0.507696 | -0.149954 |

---

**Table S5.** The theoretical Cartesian coordinates (in Å) for the structure **Ir1Se-I** using the M06L/DZP method

Standard orientation:

| Center<br>Number | Atomic<br>Number | Atomic<br>Type | Coordinates (Angstroms) |           |           |
|------------------|------------------|----------------|-------------------------|-----------|-----------|
|                  |                  |                | X                       | Y         | Z         |
| 1                | 15               | 0              | -2.594970               | -0.440251 | 0.193385  |
| 2                | 15               | 0              | -0.183972               | -0.231148 | -2.356970 |
| 3                | 15               | 0              | 0.695523                | -2.401348 | -0.201346 |
| 4                | 15               | 0              | -0.329103               | -0.156821 | 2.368001  |
| 5                | 6                | 0              | -1.992897               | -0.718509 | 2.902607  |
| 6                | 1                | 0              | -1.999826               | -1.816237 | 2.868984  |
| 7                | 1                | 0              | -2.183340               | -0.428691 | 3.941910  |
| 8                | 6                | 0              | -3.037738               | -0.140517 | 1.958504  |
| 9                | 1                | 0              | -3.102788               | 0.948864  | 2.080288  |
| 10               | 1                | 0              | -4.036924               | -0.541492 | 2.163360  |
| 11               | 6                | 0              | 0.146283                | -1.953235 | -2.895672 |
| 12               | 1                | 0              | -0.803207               | -2.504139 | -2.842175 |
| 13               | 1                | 0              | 0.470719                | -1.973370 | -3.942226 |
| 14               | 6                | 0              | 1.183179                | -2.578945 | -1.972813 |
| 15               | 1                | 0              | 2.151646                | -2.072405 | -2.084742 |
| 16               | 1                | 0              | 1.351273                | -3.635055 | -2.212905 |
| 17               | 77               | 0              | -0.289034               | -0.213870 | 0.009276  |
| 18               | 6                | 0              | -0.061201               | 1.863282  | -0.088783 |
| 19               | 6                | 0              | 1.219319                | 1.396725  | 0.057708  |
| 20               | 6                | 0              | 2.479083                | 1.165762  | 0.174231  |
| 21               | 6                | 0              | -1.596461               | 0.305466  | -3.362205 |
| 22               | 1                | 0              | -2.458702               | -0.345506 | -3.190407 |
| 23               | 1                | 0              | -1.872308               | 1.329960  | -3.095597 |
| 24               | 1                | 0              | -1.345677               | 0.274738  | -4.426473 |
| 25               | 6                | 0              | 1.198147                | 0.741232  | -3.020093 |
| 26               | 1                | 0              | 2.146079                | 0.403889  | -2.591790 |
| 27               | 1                | 0              | 1.240471                | 0.660385  | -4.110248 |
| 28               | 1                | 0              | 1.070774                | 1.791824  | -2.743109 |
| 29               | 6                | 0              | 2.272624                | -2.769900 | 0.634866  |
| 30               | 1                | 0              | 2.780921                | -3.606313 | 0.144635  |
| 31               | 1                | 0              | 2.926262                | -1.891094 | 0.603417  |
| 32               | 1                | 0              | 2.111414                | -3.039090 | 1.680855  |
| 33               | 6                | 0              | -0.267827               | -3.924322 | 0.108066  |
| 34               | 1                | 0              | -0.616925               | -3.950275 | 1.145472  |
| 35               | 1                | 0              | -1.146723               | -3.957680 | -0.541913 |
| 36               | 1                | 0              | 0.335736                | -4.819646 | -0.073455 |

|    |    |   |           |           |           |
|----|----|---|-----------|-----------|-----------|
| 37 | 6  | 0 | -3.379618 | -2.044762 | -0.181179 |
| 38 | 1  | 0 | -3.201342 | -2.319766 | -1.226258 |
| 39 | 1  | 0 | -2.952827 | -2.828492 | 0.450729  |
| 40 | 1  | 0 | -4.461199 | -2.006164 | -0.015530 |
| 41 | 6  | 0 | -3.662772 | 0.754204  | -0.662763 |
| 42 | 1  | 0 | -3.829346 | 0.463112  | -1.701914 |
| 43 | 1  | 0 | -4.636294 | 0.810528  | -0.165485 |
| 44 | 1  | 0 | -3.188301 | 1.744360  | -0.644953 |
| 45 | 6  | 0 | -0.133075 | 1.497256  | 3.088336  |
| 46 | 1  | 0 | -0.891081 | 2.179083  | 2.694220  |
| 47 | 1  | 0 | -0.208113 | 1.457055  | 4.178914  |
| 48 | 1  | 0 | 0.843662  | 1.903899  | 2.811559  |
| 49 | 6  | 0 | 0.835404  | -1.162251 | 3.332688  |
| 50 | 1  | 0 | 0.701197  | -0.989323 | 4.404569  |
| 51 | 1  | 0 | 0.682338  | -2.226719 | 3.132228  |
| 52 | 1  | 0 | 1.861695  | -0.897707 | 3.062037  |
| 53 | 34 | 0 | 4.151511  | 0.796832  | 0.316729  |
| 54 | 34 | 0 | -0.931230 | 3.385639  | -0.344826 |

---

**Table S6.** The theoretical Cartesian coordinates (in Å) for the structure **Ir1Se-II** using the M06L/DZP method

Standard orientation:

| Center<br>Number | Atomic<br>Number | Atomic<br>Type | Coordinates (Angstroms) |           |           |
|------------------|------------------|----------------|-------------------------|-----------|-----------|
|                  |                  |                | X                       | Y         | Z         |
| 1                | 15               | 0              | 2.985192                | -0.182884 | 0.112132  |
| 2                | 15               | 0              | 0.553798                | 2.367290  | -0.341108 |
| 3                | 15               | 0              | -0.176451               | 0.483214  | 2.065481  |
| 4                | 15               | 0              | 0.640255                | -2.333090 | 0.216398  |
| 5                | 6                | 0              | 2.311717                | -2.790367 | 0.830124  |
| 6                | 1                | 0              | 2.344438                | -2.564736 | 1.905083  |
| 7                | 1                | 0              | 2.475617                | -3.869159 | 0.727721  |
| 8                | 6                | 0              | 3.366552                | -1.989699 | 0.079275  |
| 9                | 1                | 0              | 3.386331                | -2.287104 | -0.977358 |
| 10               | 1                | 0              | 4.371513                | -2.171026 | 0.476893  |
| 11               | 6                | 0              | 0.517104                | 3.093327  | 1.343389  |
| 12               | 1                | 0              | 1.530246                | 3.027909  | 1.762626  |
| 13               | 1                | 0              | 0.252060                | 4.155842  | 1.303930  |
| 14               | 6                | 0              | -0.474742               | 2.302156  | 2.184141  |
| 15               | 1                | 0              | -1.497882               | 2.474365  | 1.825181  |
| 16               | 1                | 0              | -0.456659               | 2.610178  | 3.235432  |
| 17               | 77               | 0              | 0.610282                | 0.017461  | -0.073566 |
| 18               | 6                | 0              | -1.176969               | -0.145365 | -1.133300 |
| 19               | 6                | 0              | -2.475220               | -0.200071 | -0.894420 |
| 20               | 6                | 0              | -3.681244               | -0.209797 | -0.480022 |
| 21               | 6                | 0              | 3.903079                | 0.401932  | 1.581493  |
| 22               | 1                | 0              | 3.584223                | -0.150354 | 2.470310  |
| 23               | 1                | 0              | 4.982288                | 0.266787  | 1.459091  |
| 24               | 1                | 0              | 3.705911                | 1.464426  | 1.758186  |
| 25               | 6                | 0              | 4.037100                | 0.415470  | -1.254139 |
| 26               | 1                | 0              | 3.596939                | 0.139279  | -2.216194 |
| 27               | 1                | 0              | 4.141956                | 1.502166  | -1.228554 |
| 28               | 1                | 0              | 5.038278                | -0.021873 | -1.183234 |
| 29               | 6                | 0              | -1.795498               | -0.169572 | 2.575215  |
| 30               | 1                | 0              | -1.729845               | -1.213458 | 2.886264  |
| 31               | 1                | 0              | -2.176936               | 0.412764  | 3.420132  |
| 32               | 1                | 0              | -2.504584               | -0.100622 | 1.743966  |
| 33               | 6                | 0              | 0.882097                | 0.136618  | 3.511094  |
| 34               | 1                | 0              | 0.348526                | 0.341439  | 4.444578  |
| 35               | 1                | 0              | 1.196308                | -0.912408 | 3.516926  |
| 36               | 1                | 0              | 1.781480                | 0.758484  | 3.480754  |

|    |    |   |           |           |           |
|----|----|---|-----------|-----------|-----------|
| 37 | 6  | 0 | -0.496978 | -3.113713 | 1.398188  |
| 38 | 1  | 0 | -0.296742 | -2.761578 | 2.414628  |
| 39 | 1  | 0 | -1.529577 | -2.864507 | 1.137923  |
| 40 | 1  | 0 | -0.382807 | -4.201335 | 1.383363  |
| 41 | 6  | 0 | 1.907821  | 3.225733  | -1.192184 |
| 42 | 1  | 0 | 2.838929  | 3.119517  | -0.627541 |
| 43 | 1  | 0 | 2.051382  | 2.796433  | -2.187373 |
| 44 | 1  | 0 | 1.687360  | 4.291966  | -1.296816 |
| 45 | 6  | 0 | -0.938489 | 3.024644  | -1.138225 |
| 46 | 1  | 0 | -0.988631 | 2.672856  | -2.171895 |
| 47 | 1  | 0 | -1.836478 | 2.665276  | -0.628560 |
| 48 | 1  | 0 | -0.925509 | 4.118669  | -1.130493 |
| 49 | 6  | 0 | 0.406100  | -3.338150 | -1.276071 |
| 50 | 1  | 0 | 0.501229  | -4.401151 | -1.033987 |
| 51 | 1  | 0 | -0.587804 | -3.152276 | -1.691535 |
| 52 | 1  | 0 | 1.131802  | -3.068559 | -2.047017 |
| 53 | 34 | 0 | -5.306973 | -0.218296 | 0.088442  |
| 54 | 34 | 0 | -0.011309 | -0.172867 | -2.584583 |

---

**Table S7.** The theoretical Cartesian coordinates (in Å) for the structure **Ir2O-I** using the M06L/DZP method

Standard orientation:

| Center<br>Number | Atomic<br>Number | Atomic<br>Type | Coordinates (Angstroms) |           |           |
|------------------|------------------|----------------|-------------------------|-----------|-----------|
|                  |                  |                | X                       | Y         | Z         |
| 1                | 15               | 0              | -0.023773               | -0.143400 | 2.387930  |
| 2                | 15               | 0              | -0.023773               | -0.143400 | -2.387930 |
| 3                | 6                | 0              | -1.535103               | -0.919547 | -3.036467 |
| 4                | 6                | 0              | -2.091571               | -0.506148 | -4.255404 |
| 5                | 6                | 0              | -2.119565               | -1.987805 | -2.344633 |
| 6                | 6                | 0              | -3.210613               | -1.156799 | -4.774779 |
| 7                | 1                | 0              | -1.659611               | 0.338325  | -4.791942 |
| 8                | 6                | 0              | -3.232132               | -2.641025 | -2.869086 |
| 9                | 1                | 0              | -1.722033               | -2.286526 | -1.376797 |
| 10               | 6                | 0              | -3.779896               | -2.228312 | -4.085095 |
| 11               | 1                | 0              | -3.637946               | -0.822624 | -5.717082 |
| 12               | 1                | 0              | -3.681491               | -3.463438 | -2.318464 |
| 13               | 1                | 0              | -4.654480               | -2.732695 | -4.488415 |
| 14               | 6                | 0              | -0.023773               | 1.532696  | -3.070634 |
| 15               | 6                | 0              | 1.119971                | 2.078632  | -3.665506 |
| 16               | 6                | 0              | -1.167239               | 2.326965  | -2.889411 |
| 17               | 6                | 0              | 1.111484                | 3.405169  | -4.100192 |
| 18               | 1                | 0              | 2.015583                | 1.470876  | -3.790603 |
| 19               | 6                | 0              | -1.169830               | 3.646672  | -3.333414 |
| 20               | 1                | 0              | -2.036618               | 1.908257  | -2.381033 |
| 21               | 6                | 0              | -0.032456               | 4.187595  | -3.939992 |
| 22               | 1                | 0              | 2.001651                | 3.826093  | -4.561189 |
| 23               | 1                | 0              | -2.056302               | 4.259505  | -3.191154 |
| 24               | 1                | 0              | -0.035928               | 5.221208  | -4.277737 |
| 25               | 6                | 0              | -0.023773               | 1.532696  | 3.070634  |
| 26               | 6                | 0              | 1.119971                | 2.078632  | 3.665506  |
| 27               | 6                | 0              | -1.167239               | 2.326965  | 2.889411  |
| 28               | 6                | 0              | 1.111484                | 3.405169  | 4.100192  |
| 29               | 1                | 0              | 2.015583                | 1.470876  | 3.790603  |
| 30               | 6                | 0              | -1.169830               | 3.646672  | 3.333414  |
| 31               | 1                | 0              | -2.036618               | 1.908257  | 2.381033  |
| 32               | 6                | 0              | -0.032456               | 4.187595  | 3.939992  |
| 33               | 1                | 0              | 2.001651                | 3.826093  | 4.561189  |
| 34               | 1                | 0              | -2.056302               | 4.259505  | 3.191154  |
| 35               | 1                | 0              | -0.035928               | 5.221208  | 4.277737  |
| 36               | 6                | 0              | -1.535103               | -0.919547 | 3.036467  |

|    |    |   |           |           |           |
|----|----|---|-----------|-----------|-----------|
| 37 | 6  | 0 | -2.091571 | -0.506148 | 4.255404  |
| 38 | 6  | 0 | -2.119565 | -1.987805 | 2.344633  |
| 39 | 6  | 0 | -3.210613 | -1.156799 | 4.774779  |
| 40 | 1  | 0 | -1.659611 | 0.338325  | 4.791942  |
| 41 | 6  | 0 | -3.232132 | -2.641025 | 2.869086  |
| 42 | 1  | 0 | -1.722033 | -2.286526 | 1.376797  |
| 43 | 6  | 0 | -3.779896 | -2.228312 | 4.085095  |
| 44 | 1  | 0 | -3.637946 | -0.822624 | 5.717082  |
| 45 | 1  | 0 | -3.681491 | -3.463438 | 2.318464  |
| 46 | 1  | 0 | -4.654480 | -2.732695 | 4.488415  |
| 47 | 6  | 0 | 1.334868  | -1.003450 | -3.246974 |
| 48 | 6  | 0 | 1.219719  | -1.303788 | -4.613865 |
| 49 | 6  | 0 | 2.512879  | -1.339172 | -2.567805 |
| 50 | 6  | 0 | 2.264485  | -1.929928 | -5.288029 |
| 51 | 1  | 0 | 0.305536  | -1.054735 | -5.151396 |
| 52 | 6  | 0 | 3.558985  | -1.965377 | -3.247858 |
| 53 | 1  | 0 | 2.619875  | -1.099618 | -1.511492 |
| 54 | 6  | 0 | 3.437552  | -2.262358 | -4.604977 |
| 55 | 1  | 0 | 2.162617  | -2.162582 | -6.345065 |
| 56 | 1  | 0 | 4.469421  | -2.219367 | -2.711029 |
| 57 | 1  | 0 | 4.252538  | -2.753682 | -5.131279 |
| 58 | 6  | 0 | 1.334868  | -1.003450 | 3.246974  |
| 59 | 6  | 0 | 1.219719  | -1.303788 | 4.613865  |
| 60 | 6  | 0 | 2.512879  | -1.339172 | 2.567805  |
| 61 | 6  | 0 | 2.264485  | -1.929928 | 5.288029  |
| 62 | 1  | 0 | 0.305536  | -1.054735 | 5.151396  |
| 63 | 6  | 0 | 3.558985  | -1.965377 | 3.247858  |
| 64 | 1  | 0 | 2.619875  | -1.099618 | 1.511492  |
| 65 | 6  | 0 | 3.437552  | -2.262358 | 4.604977  |
| 66 | 1  | 0 | 2.162617  | -2.162582 | 6.345065  |
| 67 | 1  | 0 | 4.469421  | -2.219367 | 2.711029  |
| 68 | 1  | 0 | 4.252538  | -2.753682 | 5.131279  |
| 69 | 77 | 0 | 0.123138  | -0.170217 | 0.000000  |
| 70 | 6  | 0 | 0.890115  | 1.842796  | 0.000000  |
| 71 | 6  | 0 | 0.639732  | 3.113190  | 0.000000  |
| 72 | 6  | 0 | 1.906493  | 0.901041  | 0.000000  |
| 73 | 17 | 0 | -2.387406 | 0.441294  | 0.000000  |
| 74 | 6  | 0 | 0.443500  | -1.998606 | 0.000000  |
| 75 | 8  | 0 | 0.730015  | -3.132597 | 0.000000  |
| 76 | 8  | 0 | 3.101201  | 0.712836  | 0.000000  |
| 77 | 8  | 0 | 0.353752  | 4.255980  | 0.000000  |

---

**Table S8.** The theoretical Cartesian coordinates (in Å) for the structure **Ir2S-I** using the M06L/DZP method

Standard orientation:

| Center<br>Number | Atomic<br>Number | Atomic<br>Type | Coordinates (Angstroms) |           |           |
|------------------|------------------|----------------|-------------------------|-----------|-----------|
|                  |                  |                | X                       | Y         | Z         |
| 1                | 15               | 0              | -2.390982               | -0.216620 | -0.074201 |
| 2                | 15               | 0              | 2.384281                | -0.228712 | -0.063179 |
| 3                | 6                | 0              | 3.029982                | -1.278615 | -1.404731 |
| 4                | 6                | 0              | 4.318459                | -1.059458 | -1.916234 |
| 5                | 6                | 0              | 2.285388                | -2.365002 | -1.877068 |
| 6                | 6                | 0              | 4.853638                | -1.922666 | -2.870491 |
| 7                | 1                | 0              | 4.897163                | -0.197756 | -1.584875 |
| 8                | 6                | 0              | 2.825452                | -3.232377 | -2.824544 |
| 9                | 1                | 0              | 1.267214                | -2.513770 | -1.526232 |
| 10               | 6                | 0              | 4.111679                | -3.016898 | -3.319848 |
| 11               | 1                | 0              | 5.850249                | -1.738274 | -3.263896 |
| 12               | 1                | 0              | 2.234063                | -4.070499 | -3.184351 |
| 13               | 1                | 0              | 4.530857                | -3.691080 | -4.062775 |
| 14               | 6                | 0              | 3.005532                | 1.432973  | -0.415310 |
| 15               | 6                | 0              | 3.363061                | 2.281963  | 0.642589  |
| 16               | 6                | 0              | 3.021661                | 1.915135  | -1.732805 |
| 17               | 6                | 0              | 3.778593                | 3.585439  | 0.380319  |
| 18               | 1                | 0              | 3.314660                | 1.919922  | 1.669452  |
| 19               | 6                | 0              | 3.448084                | 3.216850  | -1.987872 |
| 20               | 1                | 0              | 2.685442                | 1.275696  | -2.547401 |
| 21               | 6                | 0              | 3.831588                | 4.051082  | -0.935519 |
| 22               | 1                | 0              | 4.055011                | 4.237964  | 1.204456  |
| 23               | 1                | 0              | 3.465139                | 3.584164  | -3.010768 |
| 24               | 1                | 0              | 4.157740                | 5.068381  | -1.138854 |
| 25               | 6                | 0              | -2.998999               | 1.456174  | -0.393286 |
| 26               | 6                | 0              | -3.336296               | 2.285026  | 0.687027  |
| 27               | 6                | 0              | -3.013202               | 1.970526  | -1.698500 |
| 28               | 6                | 0              | -3.726388               | 3.602814  | 0.459831  |
| 29               | 1                | 0              | -3.289437               | 1.896921  | 1.704444  |
| 30               | 6                | 0              | -3.416021               | 3.286387  | -1.918600 |
| 31               | 1                | 0              | -2.694584               | 1.345065  | -2.530974 |
| 32               | 6                | 0              | -3.775995               | 4.102044  | -0.843636 |
| 33               | 1                | 0              | -3.985573               | 4.239847  | 1.301373  |
| 34               | 1                | 0              | -3.431713               | 3.679493  | -2.931945 |
| 35               | 1                | 0              | -4.081782               | 5.130606  | -1.020271 |
| 36               | 6                | 0              | -3.032954               | -1.241582 | -1.435783 |



|    |    |   |           |           |           |
|----|----|---|-----------|-----------|-----------|
| 37 | 6  | 0 | -4.309884 | -1.001042 | -1.965927 |
| 38 | 6  | 0 | -2.296212 | -2.335647 | -1.903209 |
| 39 | 6  | 0 | -4.841162 | -1.850424 | -2.934950 |
| 40 | 1  | 0 | -4.882454 | -0.134290 | -1.637088 |
| 41 | 6  | 0 | -2.832505 | -3.188941 | -2.865138 |
| 42 | 1  | 0 | -1.286452 | -2.501558 | -1.535995 |
| 43 | 6  | 0 | -4.107273 | -2.951771 | -3.380009 |
| 44 | 1  | 0 | -5.828755 | -1.649765 | -3.342921 |
| 45 | 1  | 0 | -2.247183 | -4.033045 | -3.220815 |
| 46 | 1  | 0 | -4.523694 | -3.614868 | -4.134461 |
| 47 | 6  | 0 | 3.313057  | -0.763960 | 1.410642  |
| 48 | 6  | 0 | 4.708380  | -0.603213 | 1.457026  |
| 49 | 6  | 0 | 2.659882  | -1.373604 | 2.487561  |
| 50 | 6  | 0 | 5.432873  | -1.048825 | 2.558066  |
| 51 | 1  | 0 | 5.227656  | -0.114743 | 0.633097  |
| 52 | 6  | 0 | 3.388764  | -1.817496 | 3.592420  |
| 53 | 1  | 0 | 1.576761  | -1.474296 | 2.484593  |
| 54 | 6  | 0 | 4.773058  | -1.661179 | 3.628241  |
| 55 | 1  | 0 | 6.511763  | -0.917505 | 2.583389  |
| 56 | 1  | 0 | 2.866674  | -2.279110 | 4.426481  |
| 57 | 1  | 0 | 5.339349  | -2.006250 | 4.490068  |
| 58 | 6  | 0 | -3.331290 | -0.772991 | 1.384281  |
| 59 | 6  | 0 | -4.727584 | -0.618201 | 1.415383  |
| 60 | 6  | 0 | -2.688020 | -1.388802 | 2.463476  |
| 61 | 6  | 0 | -5.463366 | -1.076977 | 2.503369  |
| 62 | 1  | 0 | -5.238801 | -0.124692 | 0.589414  |
| 63 | 6  | 0 | -3.428293 | -1.846162 | 3.555277  |
| 64 | 1  | 0 | -1.604456 | -1.483717 | 2.472875  |
| 65 | 6  | 0 | -4.813614 | -1.696474 | 3.575664  |
| 66 | 1  | 0 | -6.543050 | -0.950609 | 2.516891  |
| 67 | 1  | 0 | -2.914287 | -2.313127 | 4.391369  |
| 68 | 1  | 0 | -5.388623 | -2.052377 | 4.427295  |
| 69 | 77 | 0 | -0.004214 | -0.294027 | 0.147985  |
| 70 | 6  | 0 | 0.005570  | 1.782014  | 0.880293  |
| 71 | 6  | 0 | 0.021878  | 2.906907  | 0.254893  |
| 72 | 6  | 0 | -0.008455 | 0.848748  | 1.880560  |
| 73 | 16 | 0 | -0.025895 | 0.702941  | 3.495949  |
| 74 | 16 | 0 | 0.044162  | 4.219226  | -0.604298 |
| 75 | 17 | 0 | 0.004578  | 0.155537  | -2.370517 |
| 76 | 6  | 0 | -0.010108 | -2.094290 | 0.582031  |
| 77 | 8  | 0 | -0.012217 | -3.212546 | 0.927967  |

---

**Table S9.** The theoretical Cartesian coordinates (in Å) for the structure **Ir2S-II** using the M06L/DZP method

Standard orientation:

| Center<br>Number | Atomic<br>Number | Atomic<br>Type | Coordinates (Angstroms) |           |           |
|------------------|------------------|----------------|-------------------------|-----------|-----------|
|                  |                  |                | X                       | Y         | Z         |
| 1                | 15               | 0              | 2.387712                | -0.326161 | 0.002573  |
| 2                | 15               | 0              | -2.387719               | -0.326160 | 0.002566  |
| 3                | 6                | 0              | -3.105701               | -0.855113 | 1.590179  |
| 4                | 6                | 0              | -4.361614               | -0.383517 | 2.002668  |
| 5                | 6                | 0              | -2.434896               | -1.791854 | 2.385469  |
| 6                | 6                | 0              | -4.938087               | -0.854878 | 3.181044  |
| 7                | 1                | 0              | -4.877887               | 0.374366  | 1.413706  |
| 8                | 6                | 0              | -3.016192               | -2.267806 | 3.558052  |
| 9                | 1                | 0              | -1.437922               | -2.122704 | 2.105508  |
| 10               | 6                | 0              | -4.270407               | -1.803787 | 3.957319  |
| 11               | 1                | 0              | -5.907591               | -0.475590 | 3.494523  |
| 12               | 1                | 0              | -2.480521               | -2.990262 | 4.168591  |
| 13               | 1                | 0              | -4.719654               | -2.168358 | 4.878022  |
| 14               | 6                | 0              | -3.023662               | 1.343707  | -0.262052 |
| 15               | 6                | 0              | -3.462440               | 1.758446  | -1.525640 |
| 16               | 6                | 0              | -2.924505               | 2.272755  | 0.785600  |
| 17               | 6                | 0              | -3.822174               | 3.090314  | -1.733142 |
| 18               | 1                | 0              | -3.513636               | 1.044320  | -2.346571 |
| 19               | 6                | 0              | -3.289055               | 3.599031  | 0.571806  |
| 20               | 1                | 0              | -2.532119               | 1.955422  | 1.751510  |
| 21               | 6                | 0              | -3.737404               | 4.009401  | -0.686719 |
| 22               | 1                | 0              | -4.159224               | 3.410261  | -2.715944 |
| 23               | 1                | 0              | -3.193902               | 4.319588  | 1.379816  |
| 24               | 1                | 0              | -4.006249               | 5.049647  | -0.853830 |
| 25               | 6                | 0              | 3.023662                | 1.343703  | -0.262044 |
| 26               | 6                | 0              | 3.462442                | 1.758442  | -1.525633 |
| 27               | 6                | 0              | 2.924507                | 2.272752  | 0.785606  |
| 28               | 6                | 0              | 3.822181                | 3.090307  | -1.733134 |
| 29               | 1                | 0              | 3.513639                | 1.044315  | -2.346563 |
| 30               | 6                | 0              | 3.289064                | 3.599026  | 0.571813  |
| 31               | 1                | 0              | 2.532115                | 1.955423  | 1.751516  |
| 32               | 6                | 0              | 3.737415                | 4.009395  | -0.686711 |
| 33               | 1                | 0              | 4.159233                | 3.410253  | -2.715936 |
| 34               | 1                | 0              | 3.193913                | 4.319583  | 1.379824  |
| 35               | 1                | 0              | 4.006265                | 5.049639  | -0.853822 |
| 36               | 6                | 0              | 3.105694                | -0.855114 | 1.590186  |

|    |    |   |           |           |           |
|----|----|---|-----------|-----------|-----------|
| 37 | 6  | 0 | 4.361609  | -0.383523 | 2.002673  |
| 38 | 6  | 0 | 2.434881  | -1.791844 | 2.385483  |
| 39 | 6  | 0 | 4.938078  | -0.854879 | 3.181053  |
| 40 | 1  | 0 | 4.877889  | 0.374352  | 1.413707  |
| 41 | 6  | 0 | 3.016172  | -2.267790 | 3.558071  |
| 42 | 1  | 0 | 1.437906  | -2.122688 | 2.105525  |
| 43 | 6  | 0 | 4.270390  | -1.803777 | 3.957335  |
| 44 | 1  | 0 | 5.907584  | -0.475595 | 3.494531  |
| 45 | 1  | 0 | 2.480494  | -2.990237 | 4.168615  |
| 46 | 1  | 0 | 4.719633  | -2.168343 | 4.878043  |
| 47 | 6  | 0 | -3.240766 | -1.354889 | -1.238759 |
| 48 | 6  | 0 | -4.644349 | -1.359506 | -1.283019 |
| 49 | 6  | 0 | -2.528193 | -2.161860 | -2.132964 |
| 50 | 6  | 0 | -5.319411 | -2.159865 | -2.199739 |
| 51 | 1  | 0 | -5.211382 | -0.732224 | -0.595870 |
| 52 | 6  | 0 | -3.206318 | -2.967128 | -3.049420 |
| 53 | 1  | 0 | -1.439705 | -2.149642 | -2.117937 |
| 54 | 6  | 0 | -4.600066 | -2.969829 | -3.083349 |
| 55 | 1  | 0 | -6.406225 | -2.154737 | -2.223755 |
| 56 | 1  | 0 | -2.641869 | -3.591448 | -3.737404 |
| 57 | 1  | 0 | -5.127082 | -3.598705 | -3.796981 |
| 58 | 6  | 0 | 3.240757  | -1.354890 | -1.238756 |
| 59 | 6  | 0 | 4.644340  | -1.359500 | -1.283014 |
| 60 | 6  | 0 | 2.528190  | -2.161858 | -2.132967 |
| 61 | 6  | 0 | 5.319408  | -2.159845 | -2.199741 |
| 62 | 1  | 0 | 5.211368  | -0.732224 | -0.595856 |
| 63 | 6  | 0 | 3.206320  | -2.967111 | -3.049432 |
| 64 | 1  | 0 | 1.439702  | -2.149654 | -2.117939 |
| 65 | 6  | 0 | 4.600068  | -2.969802 | -3.083362 |
| 66 | 1  | 0 | 6.406222  | -2.154710 | -2.223755 |
| 67 | 1  | 0 | 2.641876  | -3.591429 | -3.737421 |
| 68 | 1  | 0 | 5.127088  | -3.598666 | -3.797004 |
| 69 | 77 | 0 | 0.000000  | -0.427795 | -0.082065 |
| 70 | 6  | 0 | 0.000000  | 1.468203  | -1.059628 |
| 71 | 6  | 0 | 0.000000  | 2.753728  | -0.761346 |
| 72 | 16 | 0 | 0.000000  | 0.418099  | -2.378309 |
| 73 | 6  | 0 | 0.000000  | 3.912363  | -0.235024 |
| 74 | 16 | 0 | 0.000000  | 5.384487  | 0.354219  |
| 75 | 17 | 0 | 0.000000  | 0.514498  | 2.218296  |
| 76 | 6  | 0 | 0.000000  | -2.313940 | 0.115473  |
| 77 | 8  | 0 | 0.000000  | -3.481091 | 0.113004  |

---

**Table S10.** The theoretical Cartesian coordinates (in Å) for the structure **Ir2Se-I** using the M06L/DZP method

Standard orientation:

| Center Number | Atomic Number | Atomic Type | Coordinates (Angstroms) |           |           |
|---------------|---------------|-------------|-------------------------|-----------|-----------|
|               |               |             | X                       | Y         | Z         |
| 1             | 15            | 0           | 0.355965                | 0.215518  | -2.392476 |
| 2             | 15            | 0           | 0.355965                | 0.215518  | 2.392476  |
| 3             | 6             | 0           | 1.213533                | 1.671646  | 3.075525  |
| 4             | 6             | 0           | 1.125441                | 1.928931  | 4.453094  |
| 5             | 6             | 0           | 1.987246                | 2.515316  | 2.271958  |
| 6             | 6             | 0           | 1.800969                | 3.009176  | 5.013810  |
| 7             | 1             | 0           | 0.517498                | 1.287798  | 5.090562  |
| 8             | 6             | 0           | 2.668571                | 3.593967  | 2.836545  |
| 9             | 1             | 0           | 2.024227                | 2.349046  | 1.198070  |
| 10            | 6             | 0           | 2.579285                | 3.842314  | 4.205544  |
| 11            | 1             | 0           | 1.721083                | 3.199644  | 6.081168  |
| 12            | 1             | 0           | 3.262026                | 4.245564  | 2.200200  |
| 13            | 1             | 0           | 3.108197                | 4.685835  | 4.642834  |
| 14            | 6             | 0           | -1.338403               | 0.347454  | 3.011377  |
| 15            | 6             | 0           | -2.093577               | -0.810869 | 3.254214  |
| 16            | 6             | 0           | -1.932786               | 1.608978  | 3.154680  |
| 17            | 6             | 0           | -3.416392               | -0.703876 | 3.676710  |
| 18            | 1             | 0           | -1.646780               | -1.794430 | 3.108914  |
| 19            | 6             | 0           | -3.256137               | 1.708489  | 3.581335  |
| 20            | 1             | 0           | -1.360766               | 2.505197  | 2.921456  |
| 21            | 6             | 0           | -3.997212               | 0.555328  | 3.846795  |
| 22            | 1             | 0           | -3.996124               | -1.604309 | 3.862792  |
| 23            | 1             | 0           | -3.711359               | 2.689089  | 3.694717  |
| 24            | 1             | 0           | -5.030748               | 0.636190  | 4.175686  |
| 25            | 6             | 0           | -1.338403               | 0.347454  | -3.011377 |
| 26            | 6             | 0           | -2.093577               | -0.810869 | -3.254214 |
| 27            | 6             | 0           | -1.932786               | 1.608978  | -3.154680 |
| 28            | 6             | 0           | -3.416392               | -0.703876 | -3.676710 |
| 29            | 1             | 0           | -1.646780               | -1.794430 | -3.108914 |
| 30            | 6             | 0           | -3.256137               | 1.708489  | -3.581335 |
| 31            | 1             | 0           | -1.360766               | 2.505197  | -2.921456 |
| 32            | 6             | 0           | -3.997212               | 0.555328  | -3.846795 |
| 33            | 1             | 0           | -3.996124               | -1.604309 | -3.862792 |
| 34            | 1             | 0           | -3.711359               | 2.689089  | -3.694717 |
| 35            | 1             | 0           | -5.030748               | 0.636190  | -4.175686 |
| 36            | 6             | 0           | 1.213533                | 1.671646  | -3.075525 |

|    |    |   |           |           |           |
|----|----|---|-----------|-----------|-----------|
| 37 | 6  | 0 | 1.125441  | 1.928931  | -4.453094 |
| 38 | 6  | 0 | 1.987246  | 2.515316  | -2.271958 |
| 39 | 6  | 0 | 1.800969  | 3.009176  | -5.013810 |
| 40 | 1  | 0 | 0.517498  | 1.287798  | -5.090562 |
| 41 | 6  | 0 | 2.668571  | 3.593967  | -2.836545 |
| 42 | 1  | 0 | 2.024227  | 2.349046  | -1.198070 |
| 43 | 6  | 0 | 2.579285  | 3.842314  | -4.205544 |
| 44 | 1  | 0 | 1.721083  | 3.199644  | -6.081168 |
| 45 | 1  | 0 | 3.262026  | 4.245564  | -2.200200 |
| 46 | 1  | 0 | 3.108197  | 4.685835  | -4.642834 |
| 47 | 6  | 0 | 1.073669  | -1.191150 | 3.301417  |
| 48 | 6  | 0 | 0.705261  | -1.454852 | 4.631400  |
| 49 | 6  | 0 | 2.056636  | -1.984726 | 2.697768  |
| 50 | 6  | 0 | 1.316206  | -2.484244 | 5.341875  |
| 51 | 1  | 0 | -0.080655 | -0.867377 | 5.105014  |
| 52 | 6  | 0 | 2.668583  | -3.015053 | 3.411919  |
| 53 | 1  | 0 | 2.327670  | -1.819589 | 1.657305  |
| 54 | 6  | 0 | 2.303976  | -3.264343 | 4.734431  |
| 55 | 1  | 0 | 1.018417  | -2.680331 | 6.368835  |
| 56 | 1  | 0 | 3.420875  | -3.629916 | 2.924552  |
| 57 | 1  | 0 | 2.778245  | -4.070735 | 5.288833  |
| 58 | 6  | 0 | 1.073669  | -1.191150 | -3.301417 |
| 59 | 6  | 0 | 0.705261  | -1.454852 | -4.631400 |
| 60 | 6  | 0 | 2.056636  | -1.984726 | -2.697768 |
| 61 | 6  | 0 | 1.316206  | -2.484244 | -5.341875 |
| 62 | 1  | 0 | -0.080655 | -0.867377 | -5.105014 |
| 63 | 6  | 0 | 2.668583  | -3.015053 | -3.411919 |
| 64 | 1  | 0 | 2.327670  | -1.819589 | -1.657305 |
| 65 | 6  | 0 | 2.303976  | -3.264343 | -4.734431 |
| 66 | 1  | 0 | 1.018417  | -2.680331 | -6.368835 |
| 67 | 1  | 0 | 3.420875  | -3.629916 | -2.924552 |
| 68 | 1  | 0 | 2.778245  | -4.070735 | -5.288833 |
| 69 | 77 | 0 | 0.464220  | 0.058647  | 0.000000  |
| 70 | 6  | 0 | -1.416167 | -1.154917 | 0.000000  |
| 71 | 6  | 0 | -2.573967 | -0.595434 | 0.000000  |
| 72 | 6  | 0 | -0.271954 | -1.890533 | 0.000000  |
| 73 | 17 | 0 | -0.544956 | 2.411976  | 0.000000  |
| 74 | 6  | 0 | 2.311748  | 0.073634  | 0.000000  |
| 75 | 8  | 0 | 3.481564  | 0.029299  | 0.000000  |
| 76 | 34 | 0 | 0.281417  | -3.572749 | 0.000000  |
| 77 | 34 | 0 | -4.034155 | 0.291916  | 0.000000  |

---

**Table S11.** The theoretical Cartesian coordinates (in Å) for the structure **Ir2Se-II** using the M06L/DZP method

Standard orientation:

| Center<br>Number | Atomic<br>Number | Atomic<br>Type | Coordinates (Angstroms) |           |           |
|------------------|------------------|----------------|-------------------------|-----------|-----------|
|                  |                  |                | X                       | Y         | Z         |
| 1                | 15               | 0              | -0.569256               | -0.060319 | -2.391617 |
| 2                | 15               | 0              | -0.569256               | -0.060319 | 2.391617  |
| 3                | 6                | 0              | -1.181873               | -1.620343 | 3.105848  |
| 4                | 6                | 0              | -0.736937               | -2.056255 | 4.363597  |
| 5                | 6                | 0              | -2.156082               | -2.366553 | 2.432209  |
| 6                | 6                | 0              | -1.268874               | -3.209622 | 4.937783  |
| 7                | 1                | 0              | 0.047549                | -1.506496 | 4.883294  |
| 8                | 6                | 0              | -2.692282               | -3.514177 | 3.011014  |
| 9                | 1                | 0              | -2.470075               | -2.069950 | 1.434741  |
| 10               | 6                | 0              | -2.252916               | -3.937310 | 4.266209  |
| 11               | 1                | 0              | -0.909203               | -3.541955 | 5.908513  |
| 12               | 1                | 0              | -3.442679               | -4.087244 | 2.472358  |
| 13               | 1                | 0              | -2.664478               | -4.839014 | 4.713400  |
| 14               | 6                | 0              | 1.111326                | 0.112042  | 3.031084  |
| 15               | 6                | 0              | 1.597494                | 1.353026  | 3.461604  |
| 16               | 6                | 0              | 1.979341                | -0.987267 | 2.938104  |
| 17               | 6                | 0              | 2.939753                | 1.486880  | 3.818276  |
| 18               | 1                | 0              | 0.930943                | 2.213574  | 3.509174  |
| 19               | 6                | 0              | 3.315676                | -0.847254 | 3.302033  |
| 20               | 1                | 0              | 1.607615                | -1.935914 | 2.551242  |
| 21               | 6                | 0              | 3.797536                | 0.389142  | 3.740400  |
| 22               | 1                | 0              | 3.315525                | 2.452256  | 4.148090  |
| 23               | 1                | 0              | 3.988730                | -1.696557 | 3.216807  |
| 24               | 1                | 0              | 4.846750                | 0.498462  | 4.004213  |
| 25               | 6                | 0              | 1.111326                | 0.112042  | -3.031084 |
| 26               | 6                | 0              | 1.597494                | 1.353026  | -3.461604 |
| 27               | 6                | 0              | 1.979341                | -0.987267 | -2.938104 |
| 28               | 6                | 0              | 2.939753                | 1.486880  | -3.818276 |
| 29               | 1                | 0              | 0.930943                | 2.213574  | -3.509174 |
| 30               | 6                | 0              | 3.315676                | -0.847254 | -3.302033 |
| 31               | 1                | 0              | 1.607615                | -1.935914 | -2.551242 |
| 32               | 6                | 0              | 3.797536                | 0.389142  | -3.740400 |
| 33               | 1                | 0              | 3.315525                | 2.452256  | -4.148090 |
| 34               | 1                | 0              | 3.988730                | -1.696557 | -3.216807 |
| 35               | 1                | 0              | 4.846750                | 0.498462  | -4.004213 |
| 36               | 6                | 0              | -1.181873               | -1.620343 | -3.105848 |

|    |    |   |           |           |           |
|----|----|---|-----------|-----------|-----------|
| 37 | 6  | 0 | -0.736937 | -2.056255 | -4.363597 |
| 38 | 6  | 0 | -2.156082 | -2.366553 | -2.432209 |
| 39 | 6  | 0 | -1.268874 | -3.209622 | -4.937783 |
| 40 | 1  | 0 | 0.047549  | -1.506496 | -4.883294 |
| 41 | 6  | 0 | -2.692282 | -3.514177 | -3.011014 |
| 42 | 1  | 0 | -2.470075 | -2.069950 | -1.434741 |
| 43 | 6  | 0 | -2.252916 | -3.937310 | -4.266209 |
| 44 | 1  | 0 | -0.909203 | -3.541955 | -5.908513 |
| 45 | 1  | 0 | -3.442679 | -4.087244 | -2.472358 |
| 46 | 1  | 0 | -2.664478 | -4.839014 | -4.713400 |
| 47 | 6  | 0 | -1.534665 | 1.225425  | 3.254889  |
| 48 | 6  | 0 | -1.497775 | 1.285683  | 4.657463  |
| 49 | 6  | 0 | -2.340091 | 2.131689  | 2.555973  |
| 50 | 6  | 0 | -2.252916 | 2.231745  | 5.344527  |
| 51 | 1  | 0 | -0.872231 | 0.588847  | 5.214605  |
| 52 | 6  | 0 | -3.100603 | 3.077036  | 3.245970  |
| 53 | 1  | 0 | -2.362227 | 2.104418  | 1.467882  |
| 54 | 6  | 0 | -3.059518 | 3.128874  | 4.638582  |
| 55 | 1  | 0 | -2.214217 | 2.268251  | 6.430282  |
| 56 | 1  | 0 | -3.723764 | 3.774161  | 2.691489  |
| 57 | 1  | 0 | -3.652400 | 3.866018  | 5.174859  |
| 58 | 6  | 0 | -1.534665 | 1.225425  | -3.254889 |
| 59 | 6  | 0 | -1.497775 | 1.285683  | -4.657463 |
| 60 | 6  | 0 | -2.340091 | 2.131689  | -2.555973 |
| 61 | 6  | 0 | -2.252916 | 2.231745  | -5.344527 |
| 62 | 1  | 0 | -0.872231 | 0.588847  | -5.214605 |
| 63 | 6  | 0 | -3.100603 | 3.077036  | -3.245970 |
| 64 | 1  | 0 | -2.362227 | 2.104418  | -1.467882 |
| 65 | 6  | 0 | -3.059518 | 3.128874  | -4.638582 |
| 66 | 1  | 0 | -2.214217 | 2.268251  | -6.430282 |
| 67 | 1  | 0 | -3.723764 | 3.774161  | -2.691489 |
| 68 | 1  | 0 | -3.652400 | 3.866018  | -5.174859 |
| 69 | 77 | 0 | -0.661549 | 0.029599  | 0.000000  |
| 70 | 6  | 0 | 1.296185  | 0.848299  | 0.000000  |
| 71 | 6  | 0 | 2.559949  | 0.473844  | 0.000000  |
| 72 | 6  | 0 | 3.740776  | 0.002073  | 0.000000  |
| 73 | 17 | 0 | 0.146078  | -2.325963 | 0.000000  |
| 74 | 6  | 0 | -2.555138 | -0.073218 | 0.000000  |
| 75 | 8  | 0 | -3.721153 | -0.020156 | 0.000000  |
| 76 | 34 | 0 | 5.357234  | -0.608366 | 0.000000  |
| 77 | 34 | 0 | 0.295727  | 2.401177  | 0.000000  |

---

**Table S12.** The theoretical Cartesian coordinates (in Å) for the structure **NiO-I** using the M06L/DZP method

Standard orientation:

| Center Number | Atomic Number | Atomic Type | Coordinates (Angstroms) |           |           |
|---------------|---------------|-------------|-------------------------|-----------|-----------|
|               |               |             | X                       | Y         | Z         |
| 1             | 15            | 0           | 1.699851                | 0.105679  | -0.022924 |
| 2             | 15            | 0           | -1.900956               | -0.250277 | -0.075444 |
| 3             | 6             | 0           | 2.338191                | 0.161706  | 1.689116  |
| 4             | 6             | 0           | 3.056063                | 1.248273  | 2.209662  |
| 5             | 6             | 0           | 2.112741                | -0.958660 | 2.503875  |
| 6             | 6             | 0           | 3.528041                | 1.217933  | 3.522491  |
| 7             | 1             | 0           | 3.240334                | 2.123794  | 1.588106  |
| 8             | 6             | 0           | 2.593569                | -0.992026 | 3.811802  |
| 9             | 1             | 0           | 1.553035                | -1.804704 | 2.099882  |
| 10            | 6             | 0           | 3.298464                | 0.098721  | 4.326121  |
| 11            | 1             | 0           | 4.080718                | 2.068014  | 3.916067  |
| 12            | 1             | 0           | 2.413200                | -1.867956 | 4.430277  |
| 13            | 1             | 0           | 3.667322                | 0.077345  | 5.349006  |
| 14            | 6             | 0           | 1.616945                | 1.867962  | -0.510828 |
| 15            | 6             | 0           | 2.112739                | 2.310507  | -1.746857 |
| 16            | 6             | 0           | 0.924609                | 2.780793  | 0.302995  |
| 17            | 6             | 0           | 1.918309                | 3.629527  | -2.159539 |
| 18            | 1             | 0           | 2.662556                | 1.623227  | -2.389002 |
| 19            | 6             | 0           | 0.734783                | 4.097510  | -0.110307 |
| 20            | 1             | 0           | 0.540707                | 2.463083  | 1.273148  |
| 21            | 6             | 0           | 1.224165                | 4.526608  | -1.346401 |
| 22            | 1             | 0           | 2.314863                | 3.956121  | -3.118257 |
| 23            | 1             | 0           | 0.201273                | 4.789608  | 0.538171  |
| 24            | 1             | 0           | 1.071805                | 5.553859  | -1.669180 |
| 25            | 6             | 0           | 3.114283                | -0.503411 | -1.006351 |
| 26            | 6             | 0           | 4.444985                | -0.382916 | -0.589060 |
| 27            | 6             | 0           | 2.836446                | -1.095387 | -2.247035 |
| 28            | 6             | 0           | 5.480365                | -0.851827 | -1.398916 |
| 29            | 1             | 0           | 4.671998                | 0.062212  | 0.379237  |
| 30            | 6             | 0           | 3.871319                | -1.546268 | -3.064302 |
| 31            | 1             | 0           | 1.796625                | -1.220805 | -2.556394 |
| 32            | 6             | 0           | 5.196352                | -1.428472 | -2.638347 |
| 33            | 1             | 0           | 6.510309                | -0.769537 | -1.059757 |
| 34            | 1             | 0           | 3.643586                | -2.005549 | -4.023106 |
| 35            | 1             | 0           | 6.005046                | -1.795865 | -3.265667 |
| 36            | 6             | 0           | -1.802318               | 1.008494  | 1.248080  |



|    |    |   |           |           |           |
|----|----|---|-----------|-----------|-----------|
| 37 | 6  | 0 | -2.373620 | 2.283062  | 1.152526  |
| 38 | 6  | 0 | -1.093164 | 0.662993  | 2.408462  |
| 39 | 6  | 0 | -2.222326 | 3.200989  | 2.193700  |
| 40 | 1  | 0 | -2.920154 | 2.567582  | 0.254100  |
| 41 | 6  | 0 | -0.943761 | 1.576761  | 3.450453  |
| 42 | 1  | 0 | -0.642568 | -0.328899 | 2.481474  |
| 43 | 6  | 0 | -1.504092 | 2.853246  | 3.340520  |
| 44 | 1  | 0 | -2.660822 | 4.192501  | 2.105516  |
| 45 | 1  | 0 | -0.381650 | 1.297369  | 4.338843  |
| 46 | 1  | 0 | -1.381337 | 3.573696  | 4.145777  |
| 47 | 6  | 0 | -2.355865 | 0.712195  | -1.562689 |
| 48 | 6  | 0 | -3.680623 | 1.070167  | -1.854544 |
| 49 | 6  | 0 | -1.333103 | 1.124635  | -2.427605 |
| 50 | 6  | 0 | -3.971878 | 1.833142  | -2.985615 |
| 51 | 1  | 0 | -4.486649 | 0.741588  | -1.198367 |
| 52 | 6  | 0 | -1.623399 | 1.894043  | -3.553441 |
| 53 | 1  | 0 | -0.303619 | 0.832312  | -2.214762 |
| 54 | 6  | 0 | -2.943945 | 2.249693  | -3.834789 |
| 55 | 1  | 0 | -5.002686 | 2.101221  | -3.204825 |
| 56 | 1  | 0 | -0.819359 | 2.207454  | -4.215524 |
| 57 | 1  | 0 | -3.173485 | 2.842987  | -4.716749 |
| 58 | 6  | 0 | -3.453142 | -1.125470 | 0.320362  |
| 59 | 6  | 0 | -4.232070 | -0.808347 | 1.440946  |
| 60 | 6  | 0 | -3.868247 | -2.161228 | -0.530567 |
| 61 | 6  | 0 | -5.408441 | -1.511627 | 1.704804  |
| 62 | 1  | 0 | -3.923082 | -0.007740 | 2.111078  |
| 63 | 6  | 0 | -5.046246 | -2.857181 | -0.268812 |
| 64 | 1  | 0 | -3.262098 | -2.426770 | -1.394450 |
| 65 | 6  | 0 | -5.818707 | -2.535583 | 0.850538  |
| 66 | 1  | 0 | -6.004472 | -1.255933 | 2.577630  |
| 67 | 1  | 0 | -5.354368 | -3.660430 | -0.933503 |
| 68 | 1  | 0 | -6.733836 | -3.085668 | 1.057686  |
| 69 | 28 | 0 | -0.036660 | -1.354529 | -0.202573 |
| 70 | 6  | 0 | 0.864518  | -3.015789 | -0.261422 |
| 71 | 6  | 0 | 1.970068  | -3.686535 | -0.320571 |
| 72 | 6  | 0 | -0.523804 | -3.153729 | -0.313278 |
| 73 | 8  | 0 | -1.443459 | -3.933047 | -0.389209 |
| 74 | 8  | 0 | 3.004788  | -4.256372 | -0.362035 |

---

**Table S13.** The theoretical Cartesian coordinates (in Å) for the structure **NiO-II** using the M06L/DZP method

Standard orientation:

| Center<br>Number | Atomic<br>Number | Atomic<br>Type | Coordinates (Angstroms) |           |           |
|------------------|------------------|----------------|-------------------------|-----------|-----------|
|                  |                  |                | X                       | Y         | Z         |
| 1                | 15               | 0              | 1.886635                | -0.282713 | -0.181083 |
| 2                | 15               | 0              | -1.631645               | 0.225545  | -0.048287 |
| 3                | 6                | 0              | 2.495725                | -0.979076 | 1.394737  |
| 4                | 6                | 0              | 3.286862                | -0.272719 | 2.309954  |
| 5                | 6                | 0              | 2.159818                | -2.315250 | 1.667240  |
| 6                | 6                | 0              | 3.729309                | -0.889888 | 3.481167  |
| 7                | 1                | 0              | 3.554875                | 0.763750  | 2.108110  |
| 8                | 6                | 0              | 2.614045                | -2.933660 | 2.830671  |
| 9                | 1                | 0              | 1.545091                | -2.869453 | 0.955097  |
| 10               | 6                | 0              | 3.396206                | -2.220351 | 3.743047  |
| 11               | 1                | 0              | 4.340447                | -0.331365 | 4.186480  |
| 12               | 1                | 0              | 2.353347                | -3.970661 | 3.027246  |
| 13               | 1                | 0              | 3.745055                | -2.700074 | 4.654624  |
| 14               | 6                | 0              | 2.134029                | 1.516301  | -0.013336 |
| 15               | 6                | 0              | 2.721946                | 2.270929  | -1.039165 |
| 16               | 6                | 0              | 1.562363                | 2.189823  | 1.078947  |
| 17               | 6                | 0              | 2.729282                | 3.664873  | -0.978100 |
| 18               | 1                | 0              | 3.169945                | 1.767442  | -1.895338 |
| 19               | 6                | 0              | 1.566795                | 3.581865  | 1.135548  |
| 20               | 1                | 0              | 1.112061                | 1.618604  | 1.890895  |
| 21               | 6                | 0              | 2.143864                | 4.325628  | 0.103032  |
| 22               | 1                | 0              | 3.189661                | 4.235013  | -1.781916 |
| 23               | 1                | 0              | 1.113659                | 4.084195  | 1.987654  |
| 24               | 1                | 0              | 2.141207                | 5.412155  | 0.144213  |
| 25               | 6                | 0              | 3.182613                | -0.766974 | -1.373145 |
| 26               | 6                | 0              | 4.545824                | -0.610304 | -1.081763 |
| 27               | 6                | 0              | 2.799803                | -1.288408 | -2.614853 |
| 28               | 6                | 0              | 5.510154                | -0.965605 | -2.021657 |
| 29               | 1                | 0              | 4.849984                | -0.211747 | -0.113442 |
| 30               | 6                | 0              | 3.766929                | -1.640074 | -3.558690 |
| 31               | 1                | 0              | 1.740479                | -1.433610 | -2.829884 |
| 32               | 6                | 0              | 5.120611                | -1.478168 | -3.263662 |
| 33               | 1                | 0              | 6.565467                | -0.845425 | -1.788213 |
| 34               | 1                | 0              | 3.461448                | -2.046913 | -4.519445 |
| 35               | 1                | 0              | 5.874459                | -1.756985 | -3.996452 |
| 36               | 6                | 0              | -1.393750               | 0.662788  | 1.713221  |

|    |    |   |           |           |           |
|----|----|---|-----------|-----------|-----------|
| 37 | 6  | 0 | -1.734768 | 1.900439  | 2.273487  |
| 38 | 6  | 0 | -0.803831 | -0.313214 | 2.531539  |
| 39 | 6  | 0 | -1.479329 | 2.159197  | 3.620688  |
| 40 | 1  | 0 | -2.175407 | 2.677875  | 1.651788  |
| 41 | 6  | 0 | -0.552482 | -0.058288 | 3.879462  |
| 42 | 1  | 0 | -0.529018 | -1.276831 | 2.096331  |
| 43 | 6  | 0 | -0.886111 | 1.183005  | 4.425849  |
| 44 | 1  | 0 | -1.740123 | 3.127615  | 4.041967  |
| 45 | 1  | 0 | -0.086303 | -0.823842 | 4.495888  |
| 46 | 1  | 0 | -0.682331 | 1.390978  | 5.473502  |
| 47 | 6  | 0 | -1.638224 | 1.812499  | -0.958445 |
| 48 | 6  | 0 | -2.676091 | 2.748102  | -0.817052 |
| 49 | 6  | 0 | -0.591244 | 2.092716  | -1.844739 |
| 50 | 6  | 0 | -2.641335 | 3.952739  | -1.516431 |
| 51 | 1  | 0 | -3.526841 | 2.515629  | -0.175936 |
| 52 | 6  | 0 | -0.556648 | 3.296389  | -2.548161 |
| 53 | 1  | 0 | 0.192946  | 1.348951  | -1.993301 |
| 54 | 6  | 0 | -1.575914 | 4.233293  | -2.377315 |
| 55 | 1  | 0 | -3.449973 | 4.669993  | -1.397282 |
| 56 | 1  | 0 | 0.266627  | 3.498319  | -3.230155 |
| 57 | 1  | 0 | -1.552503 | 5.172045  | -2.925984 |
| 58 | 6  | 0 | -3.392935 | -0.234640 | -0.134126 |
| 59 | 6  | 0 | -4.172062 | -0.497241 | 0.998569  |
| 60 | 6  | 0 | -3.967515 | -0.368029 | -1.408341 |
| 61 | 6  | 0 | -5.512484 | -0.863709 | 0.858085  |
| 62 | 1  | 0 | -3.737550 | -0.408450 | 1.993450  |
| 63 | 6  | 0 | -5.305712 | -0.724387 | -1.544514 |
| 64 | 1  | 0 | -3.358984 | -0.187054 | -2.295054 |
| 65 | 6  | 0 | -6.081775 | -0.974081 | -0.409705 |
| 66 | 1  | 0 | -6.109742 | -1.068068 | 1.743405  |
| 67 | 1  | 0 | -5.739024 | -0.828638 | -2.535858 |
| 68 | 1  | 0 | -7.122683 | -1.268958 | -0.515864 |
| 69 | 28 | 0 | -0.127797 | -1.191490 | -0.657509 |
| 70 | 6  | 0 | -0.974044 | -2.805669 | -1.135059 |
| 71 | 6  | 0 | -2.099980 | -3.520087 | -1.250175 |
| 72 | 6  | 0 | -3.367217 | -3.555398 | -1.022489 |
| 73 | 8  | 0 | -4.522735 | -3.787840 | -0.873322 |
| 74 | 8  | 0 | 0.269086  | -2.953091 | -1.303131 |

---

**Table S14.** The theoretical Cartesian coordinates (in Å) for the structure **NiS-I** using the M06L/DZP method

Standard orientation:

| Center Number | Atomic Number | Atomic Type | Coordinates (Angstroms) |           |           |
|---------------|---------------|-------------|-------------------------|-----------|-----------|
|               |               |             | X                       | Y         | Z         |
| 1             | 15            | 0           | 1.623083                | 0.307149  | -0.027268 |
| 2             | 15            | 0           | -1.928039               | -0.079960 | -0.057968 |
| 3             | 6             | 0           | 2.350051                | 0.227449  | 1.646750  |
| 4             | 6             | 0           | 3.019593                | 1.301534  | 2.251041  |
| 5             | 6             | 0           | 2.238374                | -0.984468 | 2.344304  |
| 6             | 6             | 0           | 3.559781                | 1.165391  | 3.530779  |
| 7             | 1             | 0           | 3.110738                | 2.249881  | 1.722302  |
| 8             | 6             | 0           | 2.786544                | -1.122528 | 3.618199  |
| 9             | 1             | 0           | 1.716793                | -1.822999 | 1.879041  |
| 10            | 6             | 0           | 3.444712                | -0.045682 | 4.216655  |
| 11            | 1             | 0           | 4.073960                | 2.006056  | 3.990721  |
| 12            | 1             | 0           | 2.697169                | -2.070463 | 4.143057  |
| 13            | 1             | 0           | 3.868237                | -0.149646 | 5.212838  |
| 14            | 6             | 0           | 1.380064                | 2.096536  | -0.314539 |
| 15            | 6             | 0           | 1.775818                | 2.702666  | -1.516121 |
| 16            | 6             | 0           | 0.662957                | 2.858665  | 0.621929  |
| 17            | 6             | 0           | 1.454576                | 4.035068  | -1.778162 |
| 18            | 1             | 0           | 2.339622                | 2.130654  | -2.252685 |
| 19            | 6             | 0           | 0.341714                | 4.188958  | 0.357242  |
| 20            | 1             | 0           | 0.366994                | 2.411783  | 1.571808  |
| 21            | 6             | 0           | 0.730751                | 4.781117  | -0.846979 |
| 22            | 1             | 0           | 1.772175                | 4.489744  | -2.713990 |
| 23            | 1             | 0           | -0.213450               | 4.761974  | 1.097329  |
| 24            | 1             | 0           | 0.477463                | 5.818062  | -1.054022 |
| 25            | 6             | 0           | 3.006046                | -0.080898 | -1.152450 |
| 26            | 6             | 0           | 4.342083                | 0.192204  | -0.836341 |
| 27            | 6             | 0           | 2.695981                | -0.643535 | -2.397957 |
| 28            | 6             | 0           | 5.353080                | -0.098529 | -1.752434 |
| 29            | 1             | 0           | 4.593571                | 0.615669  | 0.135768  |
| 30            | 6             | 0           | 3.704711                | -0.920419 | -3.319557 |
| 31            | 1             | 0           | 1.657103                | -0.886068 | -2.632388 |
| 32            | 6             | 0           | 5.035868                | -0.649678 | -2.996177 |
| 33            | 1             | 0           | 6.389870                | 0.103422  | -1.494329 |
| 34            | 1             | 0           | 3.453827                | -1.361758 | -4.280940 |
| 35            | 1             | 0           | 5.826310                | -0.877714 | -3.707378 |
| 36            | 6             | 0           | -1.839326               | 0.851308  | 1.516339  |

|    |    |   |           |           |           |
|----|----|---|-----------|-----------|-----------|
| 37 | 6  | 0 | -2.440420 | 2.096770  | 1.735505  |
| 38 | 6  | 0 | -1.069437 | 0.279180  | 2.540991  |
| 39 | 6  | 0 | -2.260627 | 2.761285  | 2.949354  |
| 40 | 1  | 0 | -3.020228 | 2.569089  | 0.944763  |
| 41 | 6  | 0 | -0.888706 | 0.940227  | 3.754943  |
| 42 | 1  | 0 | -0.592189 | -0.688579 | 2.368224  |
| 43 | 6  | 0 | -1.481126 | 2.189261  | 3.958476  |
| 44 | 1  | 0 | -2.722341 | 3.733896  | 3.103909  |
| 45 | 1  | 0 | -0.274871 | 0.487277  | 4.530285  |
| 46 | 1  | 0 | -1.334824 | 2.716018  | 4.898529  |
| 47 | 6  | 0 | -2.282878 | 1.156494  | -1.352174 |
| 48 | 6  | 0 | -3.510168 | 1.835289  | -1.435541 |
| 49 | 6  | 0 | -1.301648 | 1.410621  | -2.317855 |
| 50 | 6  | 0 | -3.733190 | 2.767623  | -2.447013 |
| 51 | 1  | 0 | -4.300287 | 1.611924  | -0.718447 |
| 52 | 6  | 0 | -1.524180 | 2.341512  | -3.332326 |
| 53 | 1  | 0 | -0.361045 | 0.857840  | -2.276200 |
| 54 | 6  | 0 | -2.738327 | 3.025511  | -3.394858 |
| 55 | 1  | 0 | -4.687239 | 3.286632  | -2.502459 |
| 56 | 1  | 0 | -0.750176 | 2.527960  | -4.073491 |
| 57 | 1  | 0 | -2.916321 | 3.749543  | -4.186464 |
| 58 | 6  | 0 | -3.502620 | -0.983064 | 0.087419  |
| 59 | 6  | 0 | -3.960420 | -1.426747 | 1.334533  |
| 60 | 6  | 0 | -4.188752 | -1.378160 | -1.070758 |
| 61 | 6  | 0 | -5.097837 | -2.228416 | 1.424172  |
| 62 | 1  | 0 | -3.429278 | -1.141868 | 2.241992  |
| 63 | 6  | 0 | -5.329762 | -2.172792 | -0.978440 |
| 64 | 1  | 0 | -3.825477 | -1.065978 | -2.049495 |
| 65 | 6  | 0 | -5.787764 | -2.600466 | 0.269177  |
| 66 | 1  | 0 | -5.444908 | -2.563782 | 2.398635  |
| 67 | 1  | 0 | -5.853760 | -2.469890 | -1.883671 |
| 68 | 1  | 0 | -6.673840 | -3.226756 | 0.339965  |
| 69 | 28 | 0 | -0.063075 | -1.198724 | -0.288854 |
| 70 | 6  | 0 | 0.787443  | -2.922790 | -0.456391 |
| 71 | 6  | 0 | 2.023952  | -3.283923 | -0.443739 |
| 72 | 6  | 0 | -0.581358 | -2.984251 | -0.492186 |
| 73 | 16 | 0 | -1.851879 | -3.975380 | -0.621246 |
| 74 | 16 | 0 | 3.560851  | -3.631835 | -0.412606 |

---

**Table S15.** The theoretical Cartesian coordinates (in Å) for the structure **NiS-II** using the M06L/DZP method

Standard orientation:

| Center<br>Number | Atomic<br>Number | Atomic<br>Type | Coordinates (Angstroms) |           |           |
|------------------|------------------|----------------|-------------------------|-----------|-----------|
|                  |                  |                | X                       | Y         | Z         |
| 1                | 15               | 0              | 1.910145                | -0.481481 | -0.092779 |
| 2                | 15               | 0              | -1.446993               | 0.635339  | -0.019856 |
| 3                | 6                | 0              | 2.497736                | -0.938238 | 1.578237  |
| 4                | 6                | 0              | 3.539648                | -0.267511 | 2.234480  |
| 5                | 6                | 0              | 1.893887                | -2.037660 | 2.207050  |
| 6                | 6                | 0              | 3.964482                | -0.685567 | 3.496185  |
| 7                | 1                | 0              | 4.017099                | 0.588033  | 1.758050  |
| 8                | 6                | 0              | 2.323366                | -2.458869 | 3.464562  |
| 9                | 1                | 0              | 1.085543                | -2.566694 | 1.699454  |
| 10               | 6                | 0              | 3.358136                | -1.781600 | 4.114164  |
| 11               | 1                | 0              | 4.772969                | -0.156281 | 3.994539  |
| 12               | 1                | 0              | 1.847385                | -3.314391 | 3.937396  |
| 13               | 1                | 0              | 3.691696                | -2.107017 | 5.096769  |
| 14               | 6                | 0              | 2.447453                | 1.256956  | -0.289086 |
| 15               | 6                | 0              | 3.047132                | 1.695225  | -1.479702 |
| 16               | 6                | 0              | 2.148810                | 2.205055  | 0.703116  |
| 17               | 6                | 0              | 3.334028                | 3.045956  | -1.676199 |
| 18               | 1                | 0              | 3.294598                | 0.977045  | -2.260940 |
| 19               | 6                | 0              | 2.438493                | 3.554078  | 0.504894  |
| 20               | 1                | 0              | 1.703068                | 1.886586  | 1.645865  |
| 21               | 6                | 0              | 3.026392                | 3.981883  | -0.687581 |
| 22               | 1                | 0              | 3.801270                | 3.366063  | -2.604854 |
| 23               | 1                | 0              | 2.203737                | 4.270967  | 1.289060  |
| 24               | 1                | 0              | 3.250310                | 5.034795  | -0.841151 |
| 25               | 6                | 0              | 3.063342                | -1.355171 | -1.211385 |
| 26               | 6                | 0              | 4.386956                | -1.638915 | -0.849839 |
| 27               | 6                | 0              | 2.619427                | -1.690934 | -2.497486 |
| 28               | 6                | 0              | 5.250379                | -2.247008 | -1.760498 |
| 29               | 1                | 0              | 4.741727                | -1.393920 | 0.150724  |
| 30               | 6                | 0              | 3.486880                | -2.287089 | -3.413012 |
| 31               | 1                | 0              | 1.582221                | -1.495187 | -2.773449 |
| 32               | 6                | 0              | 4.804607                | -2.566549 | -3.044941 |
| 33               | 1                | 0              | 6.272963                | -2.472028 | -1.467122 |
| 34               | 1                | 0              | 3.130226                | -2.542889 | -4.407671 |
| 35               | 1                | 0              | 5.480007                | -3.039903 | -3.753613 |
| 36               | 6                | 0              | -0.942944               | 1.388839  | 1.567957  |

|    |    |   |           |           |           |
|----|----|---|-----------|-----------|-----------|
| 37 | 6  | 0 | -1.003269 | 2.759980  | 1.844963  |
| 38 | 6  | 0 | -0.436515 | 0.518553  | 2.544294  |
| 39 | 6  | 0 | -0.539363 | 3.251153  | 3.065878  |
| 40 | 1  | 0 | -1.383723 | 3.452327  | 1.096032  |
| 41 | 6  | 0 | 0.029903  | 1.006671  | 3.764387  |
| 42 | 1  | 0 | -0.390672 | -0.551116 | 2.328376  |
| 43 | 6  | 0 | -0.013891 | 2.378690  | 4.023581  |
| 44 | 1  | 0 | -0.579579 | 4.319310  | 3.267356  |
| 45 | 1  | 0 | 0.440161  | 0.317330  | 4.498800  |
| 46 | 1  | 0 | 0.358539  | 2.767553  | 4.968176  |
| 47 | 6  | 0 | -1.257146 | 1.943650  | -1.281294 |
| 48 | 6  | 0 | -2.100517 | 3.065887  | -1.326680 |
| 49 | 6  | 0 | -0.259734 | 1.807189  | -2.254117 |
| 50 | 6  | 0 | -1.926659 | 4.040851  | -2.306883 |
| 51 | 1  | 0 | -2.914344 | 3.157158  | -0.607304 |
| 52 | 6  | 0 | -0.083655 | 2.782307  | -3.235580 |
| 53 | 1  | 0 | 0.371441  | 0.916921  | -2.246073 |
| 54 | 6  | 0 | -0.912582 | 3.903875  | -3.259795 |
| 55 | 1  | 0 | -2.586688 | 4.904488  | -2.332568 |
| 56 | 1  | 0 | 0.697580  | 2.661070  | -3.982678 |
| 57 | 1  | 0 | -0.780161 | 4.663806  | -4.026076 |
| 58 | 6  | 0 | -3.254419 | 0.516110  | 0.141596  |
| 59 | 6  | 0 | -3.883176 | 0.490351  | 1.392084  |
| 60 | 6  | 0 | -4.028750 | 0.351272  | -1.018555 |
| 61 | 6  | 0 | -5.267400 | 0.333871  | 1.479596  |
| 62 | 1  | 0 | -3.293509 | 0.602760  | 2.301233  |
| 63 | 6  | 0 | -5.409340 | 0.201654  | -0.928236 |
| 64 | 1  | 0 | -3.544428 | 0.339567  | -1.995242 |
| 65 | 6  | 0 | -6.032938 | 0.193772  | 0.322395  |
| 66 | 1  | 0 | -5.746174 | 0.318736  | 2.455889  |
| 67 | 1  | 0 | -5.998580 | 0.069738  | -1.832370 |
| 68 | 1  | 0 | -7.110034 | 0.063803  | 0.391715  |
| 69 | 16 | 0 | -0.033747 | -3.269089 | -0.858702 |
| 70 | 28 | 0 | -0.241591 | -1.148808 | -0.399841 |
| 71 | 6  | 0 | -1.515530 | -2.514308 | -0.607862 |
| 72 | 6  | 0 | -2.809920 | -2.778810 | -0.553133 |
| 73 | 6  | 0 | -4.055314 | -3.004033 | -0.444571 |
| 74 | 16 | 0 | -5.601586 | -3.337740 | -0.316371 |

---

**Table S16.** The theoretical Cartesian coordinates (in Å) for the structure **NiSe-I** using the M06L/DZP method

Standard orientation:

| Center Number | Atomic Number | Atomic Type | Coordinates (Angstroms) |           |           |
|---------------|---------------|-------------|-------------------------|-----------|-----------|
|               |               |             | X                       | Y         | Z         |
| 1             | 15            | 0           | 1.474058                | 0.751485  | -0.086413 |
| 2             | 15            | 0           | -2.024905               | 0.115773  | 0.019616  |
| 3             | 6             | 0           | 2.275237                | 0.873257  | 1.552197  |
| 4             | 6             | 0           | 2.861528                | 2.056323  | 2.025752  |
| 5             | 6             | 0           | 2.318759                | -0.276797 | 2.354621  |
| 6             | 6             | 0           | 3.472895                | 2.089314  | 3.278933  |
| 7             | 1             | 0           | 2.829867                | 2.958233  | 1.415727  |
| 8             | 6             | 0           | 2.943601                | -0.247092 | 3.600474  |
| 9             | 1             | 0           | 1.860452                | -1.199379 | 1.993793  |
| 10            | 6             | 0           | 3.517307                | 0.937473  | 4.068047  |
| 11            | 1             | 0           | 3.917666                | 3.014677  | 3.637463  |
| 12            | 1             | 0           | 2.977843                | -1.149258 | 4.206051  |
| 13            | 1             | 0           | 3.997784                | 0.963512  | 5.043552  |
| 14            | 6             | 0           | 1.069905                | 2.490764  | -0.480538 |
| 15            | 6             | 0           | 1.383417                | 3.050522  | -1.727369 |
| 16            | 6             | 0           | 0.327436                | 3.254985  | 0.434418  |
| 17            | 6             | 0           | 0.962805                | 4.340864  | -2.052420 |
| 18            | 1             | 0           | 1.962470                | 2.476701  | -2.450551 |
| 19            | 6             | 0           | -0.096238               | 4.541355  | 0.105975  |
| 20            | 1             | 0           | 0.093190                | 2.846796  | 1.418100  |
| 21            | 6             | 0           | 0.216696                | 5.088887  | -1.140842 |
| 22            | 1             | 0           | 1.219400                | 4.760581  | -3.022744 |
| 23            | 1             | 0           | -0.670713               | 5.115117  | 0.830631  |
| 24            | 1             | 0           | -0.113819               | 6.092870  | -1.396551 |
| 25            | 6             | 0           | 2.841104                | 0.404690  | -1.245550 |
| 26            | 6             | 0           | 4.131988                | 0.914410  | -1.057685 |
| 27            | 6             | 0           | 2.563330                | -0.361670 | -2.384613 |
| 28            | 6             | 0           | 5.132449                | 0.652707  | -1.993074 |
| 29            | 1             | 0           | 4.357026                | 1.504943  | -0.169883 |
| 30            | 6             | 0           | 3.560911                | -0.614589 | -3.325904 |
| 31            | 1             | 0           | 1.563469                | -0.780983 | -2.516399 |
| 32            | 6             | 0           | 4.847462                | -0.109431 | -3.129345 |
| 33            | 1             | 0           | 6.135537                | 1.041716  | -1.834916 |
| 34            | 1             | 0           | 3.337828                | -1.219434 | -4.201020 |
| 35            | 1             | 0           | 5.630206                | -0.315626 | -3.855562 |
| 36            | 6             | 0           | -1.939470               | 1.105459  | 1.559640  |



|    |    |   |           |           |           |
|----|----|---|-----------|-----------|-----------|
| 37 | 6  | 0 | -2.619977 | 2.310397  | 1.777516  |
| 38 | 6  | 0 | -1.081051 | 0.622186  | 2.559197  |
| 39 | 6  | 0 | -2.429427 | 3.021561  | 2.962987  |
| 40 | 1  | 0 | -3.271582 | 2.717960  | 1.006665  |
| 41 | 6  | 0 | -0.889590 | 1.329659  | 3.744669  |
| 42 | 1  | 0 | -0.543161 | -0.313927 | 2.389500  |
| 43 | 6  | 0 | -1.560648 | 2.538101  | 3.945471  |
| 44 | 1  | 0 | -2.953809 | 3.962298  | 3.116027  |
| 45 | 1  | 0 | -0.204779 | 0.945827  | 4.497424  |
| 46 | 1  | 0 | -1.406902 | 3.102538  | 4.862210  |
| 47 | 6  | 0 | -2.474344 | 1.274330  | -1.317273 |
| 48 | 6  | 0 | -3.717166 | 1.927741  | -1.373117 |
| 49 | 6  | 0 | -1.550678 | 1.489424  | -2.347004 |
| 50 | 6  | 0 | -4.009240 | 2.800306  | -2.419600 |
| 51 | 1  | 0 | -4.467411 | 1.727170  | -0.608324 |
| 52 | 6  | 0 | -1.843760 | 2.357838  | -3.398378 |
| 53 | 1  | 0 | -0.597633 | 0.956259  | -2.324514 |
| 54 | 6  | 0 | -3.070323 | 3.020788  | -3.431955 |
| 55 | 1  | 0 | -4.974267 | 3.300726  | -2.452089 |
| 56 | 1  | 0 | -1.112604 | 2.515500  | -4.188166 |
| 57 | 1  | 0 | -3.302401 | 3.698065  | -4.250606 |
| 58 | 6  | 0 | -3.552459 | -0.849448 | 0.242745  |
| 59 | 6  | 0 | -3.936265 | -1.286446 | 1.517244  |
| 60 | 6  | 0 | -4.278820 | -1.284757 | -0.875624 |
| 61 | 6  | 0 | -5.044667 | -2.117272 | 1.673979  |
| 62 | 1  | 0 | -3.370158 | -0.970214 | 2.392709  |
| 63 | 6  | 0 | -5.390571 | -2.109998 | -0.716111 |
| 64 | 1  | 0 | -3.972996 | -0.976576 | -1.874963 |
| 65 | 6  | 0 | -5.778436 | -2.526465 | 0.558694  |
| 66 | 1  | 0 | -5.336045 | -2.444813 | 2.669146  |
| 67 | 1  | 0 | -5.948835 | -2.435623 | -1.590503 |
| 68 | 1  | 0 | -6.644143 | -3.173072 | 0.681645  |
| 69 | 28 | 0 | -0.093172 | -0.899356 | -0.188013 |
| 70 | 6  | 0 | 0.868190  | -2.594936 | -0.217034 |
| 71 | 6  | 0 | 2.135070  | -2.797987 | -0.116895 |
| 72 | 6  | 0 | -0.487978 | -2.721448 | -0.307827 |
| 73 | 34 | 0 | -1.783422 | -3.907922 | -0.471952 |
| 74 | 34 | 0 | 3.836543  | -2.977946 | 0.043013  |

---

**Table S17.** The theoretical Cartesian coordinates (in Å) for the structure **NiSe-II** using the M06L/DZP method

Standard orientation:

| Center<br>Number | Atomic<br>Number | Atomic<br>Type | Coordinates (Angstroms) |           |           |
|------------------|------------------|----------------|-------------------------|-----------|-----------|
|                  |                  |                | X                       | Y         | Z         |
| 1                | 15               | 0              | 2.104858                | -0.585776 | -0.036412 |
| 2                | 15               | 0              | -0.975400               | 1.145418  | -0.018858 |
| 3                | 6                | 0              | 2.696882                | -0.860523 | 1.673479  |
| 4                | 6                | 0              | 3.877900                | -0.292192 | 2.173643  |
| 5                | 6                | 0              | 1.951814                | -1.714510 | 2.500039  |
| 6                | 6                | 0              | 4.299609                | -0.568013 | 3.474645  |
| 7                | 1                | 0              | 4.470104                | 0.370593  | 1.544159  |
| 8                | 6                | 0              | 2.377540                | -1.995850 | 3.797288  |
| 9                | 1                | 0              | 1.033740                | -2.162758 | 2.115381  |
| 10               | 6                | 0              | 3.551446                | -1.420617 | 4.289536  |
| 11               | 1                | 0              | 5.217564                | -0.120837 | 3.848767  |
| 12               | 1                | 0              | 1.790189                | -2.662569 | 4.423742  |
| 13               | 1                | 0              | 3.882982                | -1.636748 | 5.302532  |
| 14               | 6                | 0              | 2.915158                | 0.980808  | -0.528435 |
| 15               | 6                | 0              | 3.504169                | 1.119316  | -1.794430 |
| 16               | 6                | 0              | 2.840321                | 2.108208  | 0.305208  |
| 17               | 6                | 0              | 3.995511                | 2.353208  | -2.219835 |
| 18               | 1                | 0              | 3.582250                | 0.257099  | -2.455841 |
| 19               | 6                | 0              | 3.329724                | 3.341364  | -0.123187 |
| 20               | 1                | 0              | 2.409345                | 2.020759  | 1.302565  |
| 21               | 6                | 0              | 3.904147                | 3.471082  | -1.389555 |
| 22               | 1                | 0              | 4.449742                | 2.439778  | -3.204256 |
| 23               | 1                | 0              | 3.262607                | 4.201498  | 0.539898  |
| 24               | 1                | 0              | 4.283034                | 4.433919  | -1.723450 |
| 25               | 6                | 0              | 3.054957                | -1.805093 | -1.018118 |
| 26               | 6                | 0              | 4.319319                | -2.251566 | -0.613196 |
| 27               | 6                | 0              | 2.536459                | -2.244593 | -2.244298 |
| 28               | 6                | 0              | 5.052418                | -3.121838 | -1.419317 |
| 29               | 1                | 0              | 4.729500                | -1.926658 | 0.341842  |
| 30               | 6                | 0              | 3.275721                | -3.104919 | -3.057138 |
| 31               | 1                | 0              | 1.541944                | -1.919700 | -2.554138 |
| 32               | 6                | 0              | 4.535084                | -3.545830 | -2.644952 |
| 33               | 1                | 0              | 6.028805                | -3.468972 | -1.089814 |
| 34               | 1                | 0              | 2.862925                | -3.438002 | -4.006069 |
| 35               | 1                | 0              | 5.108059                | -4.223121 | -3.273757 |
| 36               | 6                | 0              | -0.250562               | 1.996669  | 1.428514  |

|    |    |   |           |           |           |
|----|----|---|-----------|-----------|-----------|
| 37 | 6  | 0 | -0.009136 | 3.374158  | 1.495505  |
| 38 | 6  | 0 | 0.100579  | 1.190606  | 2.520983  |
| 39 | 6  | 0 | 0.592526  | 3.928156  | 2.625772  |
| 40 | 1  | 0 | -0.257545 | 4.013118  | 0.650056  |
| 41 | 6  | 0 | 0.703420  | 1.741197  | 3.651411  |
| 42 | 1  | 0 | -0.087856 | 0.116140  | 2.468901  |
| 43 | 6  | 0 | 0.956778  | 3.113815  | 3.702120  |
| 44 | 1  | 0 | 0.786627  | 4.997834  | 2.662826  |
| 45 | 1  | 0 | 0.986718  | 1.095579  | 4.479871  |
| 46 | 1  | 0 | 1.436249  | 3.548602  | 4.576054  |
| 47 | 6  | 0 | -0.620380 | 2.201060  | -1.465912 |
| 48 | 6  | 0 | -1.203958 | 3.467617  | -1.637752 |
| 49 | 6  | 0 | 0.241949  | 1.714422  | -2.455600 |
| 50 | 6  | 0 | -0.899037 | 4.238647  | -2.757479 |
| 51 | 1  | 0 | -1.920793 | 3.835492  | -0.903914 |
| 52 | 6  | 0 | 0.545852  | 2.483359  | -3.578368 |
| 53 | 1  | 0 | 0.662907  | 0.713169  | -2.345082 |
| 54 | 6  | 0 | -0.017544 | 3.750682  | -3.726869 |
| 55 | 1  | 0 | -1.356878 | 5.217200  | -2.879555 |
| 56 | 1  | 0 | 1.220974  | 2.090480  | -4.335418 |
| 57 | 1  | 0 | 0.215818  | 4.352838  | -4.601699 |
| 58 | 6  | 0 | -2.760043 | 1.403357  | 0.220311  |
| 59 | 6  | 0 | -3.311382 | 1.583391  | 1.494532  |
| 60 | 6  | 0 | -3.613247 | 1.325282  | -0.891871 |
| 61 | 6  | 0 | -4.692482 | 1.713823  | 1.650084  |
| 62 | 1  | 0 | -2.661764 | 1.634454  | 2.367455  |
| 63 | 6  | 0 | -4.989285 | 1.462533  | -0.734196 |
| 64 | 1  | 0 | -3.195105 | 1.157515  | -1.884188 |
| 65 | 6  | 0 | -5.532445 | 1.657976  | 0.538113  |
| 66 | 1  | 0 | -5.110832 | 1.856450  | 2.643435  |
| 67 | 1  | 0 | -5.642005 | 1.393755  | -1.600646 |
| 68 | 1  | 0 | -6.608775 | 1.749983  | 0.660961  |
| 69 | 28 | 0 | -0.147931 | -0.878888 | -0.177639 |
| 70 | 6  | 0 | -1.693003 | -1.943325 | -0.209187 |
| 71 | 6  | 0 | -3.015073 | -1.929356 | -0.176468 |
| 72 | 6  | 0 | -4.284372 | -1.935391 | -0.133245 |
| 73 | 34 | 0 | -0.326963 | -3.168721 | -0.317444 |
| 74 | 34 | 0 | -6.011988 | -1.997320 | -0.082507 |

---

**Table S18.** The theoretical Cartesian coordinates (in Å) for the structure **PtO-I** using the M06L/DZP method

Standard orientation:

| Center Number | Atomic Number | Atomic Type | Coordinates (Angstroms) |           |           |
|---------------|---------------|-------------|-------------------------|-----------|-----------|
|               |               |             | X                       | Y         | Z         |
| 1             | 15            | 0           | 1.729198                | 0.343355  | -0.012196 |
| 2             | 15            | 0           | -1.954538               | -0.020213 | -0.015504 |
| 3             | 6             | 0           | 2.310781                | 0.608186  | 1.696450  |
| 4             | 6             | 0           | 2.963366                | 1.773851  | 2.122530  |
| 5             | 6             | 0           | 2.122839                | -0.440303 | 2.610376  |
| 6             | 6             | 0           | 3.408775                | 1.891889  | 3.439761  |
| 7             | 1             | 0           | 3.123424                | 2.592286  | 1.421887  |
| 8             | 6             | 0           | 2.576296                | -0.324872 | 3.923450  |
| 9             | 1             | 0           | 1.611315                | -1.347455 | 2.281480  |
| 10            | 6             | 0           | 3.216416                | 0.844238  | 4.342860  |
| 11            | 1             | 0           | 3.913618                | 2.801146  | 3.757984  |
| 12            | 1             | 0           | 2.426750                | -1.146326 | 4.619819  |
| 13            | 1             | 0           | 3.566386                | 0.937057  | 5.368385  |
| 14            | 6             | 0           | 1.610156                | 2.021205  | -0.720554 |
| 15            | 6             | 0           | 2.108622                | 2.293047  | -2.003914 |
| 16            | 6             | 0           | 0.906627                | 3.030212  | -0.041298 |
| 17            | 6             | 0           | 1.917954                | 3.545140  | -2.589505 |
| 18            | 1             | 0           | 2.660965                | 1.526163  | -2.545259 |
| 19            | 6             | 0           | 0.721454                | 4.281252  | -0.628290 |
| 20            | 1             | 0           | 0.516385                | 2.845248  | 0.960884  |
| 21            | 6             | 0           | 1.224403                | 4.544240  | -1.904711 |
| 22            | 1             | 0           | 2.319867                | 3.740263  | -3.581223 |
| 23            | 1             | 0           | 0.180907                | 5.051652  | -0.082304 |
| 24            | 1             | 0           | 1.078661                | 5.520712  | -2.359992 |
| 25            | 6             | 0           | 3.191431                | -0.342806 | -0.866492 |
| 26            | 6             | 0           | 4.500146                | -0.076722 | -0.443854 |
| 27            | 6             | 0           | 2.986933                | -1.132206 | -2.007513 |
| 28            | 6             | 0           | 5.585987                | -0.599267 | -1.146459 |
| 29            | 1             | 0           | 4.670794                | 0.528495  | 0.445937  |
| 30            | 6             | 0           | 4.073453                | -1.641390 | -2.718017 |
| 31            | 1             | 0           | 1.967269                | -1.359819 | -2.323038 |
| 32            | 6             | 0           | 5.374982                | -1.378776 | -2.285876 |
| 33            | 1             | 0           | 6.598033                | -0.399495 | -0.802273 |
| 34            | 1             | 0           | 3.902350                | -2.256919 | -3.597698 |
| 35            | 1             | 0           | 6.222528                | -1.789595 | -2.829477 |
| 36            | 6             | 0           | -1.786470               | 1.326474  | 1.206124  |

|    |    |   |           |           |           |
|----|----|---|-----------|-----------|-----------|
| 37 | 6  | 0 | -2.331240 | 2.605178  | 1.032584  |
| 38 | 6  | 0 | -1.024366 | 1.057653  | 2.352850  |
| 39 | 6  | 0 | -2.102451 | 3.601718  | 1.983884  |
| 40 | 1  | 0 | -2.911216 | 2.832227  | 0.138638  |
| 41 | 6  | 0 | -0.792564 | 2.052614  | 3.301540  |
| 42 | 1  | 0 | -0.589736 | 0.064600  | 2.480074  |
| 43 | 6  | 0 | -1.328150 | 3.330473  | 3.114743  |
| 44 | 1  | 0 | -2.521705 | 4.594293  | 1.835517  |
| 45 | 1  | 0 | -0.180909 | 1.832705  | 4.173873  |
| 46 | 1  | 0 | -1.141012 | 4.112316  | 3.847003  |
| 47 | 6  | 0 | -2.429478 | 0.835344  | -1.555300 |
| 48 | 6  | 0 | -3.757430 | 1.193247  | -1.830790 |
| 49 | 6  | 0 | -1.425017 | 1.170402  | -2.473356 |
| 50 | 6  | 0 | -4.070463 | 1.887817  | -2.999254 |
| 51 | 1  | 0 | -4.548465 | 0.917464  | -1.133084 |
| 52 | 6  | 0 | -1.737636 | 1.874730  | -3.635352 |
| 53 | 1  | 0 | -0.396998 | 0.864298  | -2.271536 |
| 54 | 6  | 0 | -3.060521 | 2.235467  | -3.899722 |
| 55 | 1  | 0 | -5.103447 | 2.155954  | -3.207799 |
| 56 | 1  | 0 | -0.949066 | 2.132590  | -4.338768 |
| 57 | 1  | 0 | -3.306657 | 2.777798  | -4.809702 |
| 58 | 6  | 0 | -3.485555 | -0.874759 | 0.476340  |
| 59 | 6  | 0 | -4.372506 | -0.368948 | 1.436425  |
| 60 | 6  | 0 | -3.777197 | -2.089026 | -0.160831 |
| 61 | 6  | 0 | -5.538111 | -1.070271 | 1.751097  |
| 62 | 1  | 0 | -4.150359 | 0.568979  | 1.944721  |
| 63 | 6  | 0 | -4.945243 | -2.781526 | 0.149310  |
| 64 | 1  | 0 | -3.073686 | -2.505990 | -0.879017 |
| 65 | 6  | 0 | -5.828036 | -2.273847 | 1.105938  |
| 66 | 1  | 0 | -6.219110 | -0.674593 | 2.500980  |
| 67 | 1  | 0 | -5.155404 | -3.727000 | -0.344337 |
| 68 | 1  | 0 | -6.734261 | -2.820568 | 1.356244  |
| 69 | 78 | 0 | -0.057798 | -1.305849 | -0.116143 |
| 70 | 6  | 0 | 0.901138  | -3.138715 | -0.130618 |
| 71 | 6  | 0 | 2.022770  | -3.785955 | -0.127260 |
| 72 | 6  | 0 | -0.492153 | -3.307647 | -0.172660 |
| 73 | 8  | 0 | -1.384475 | -4.117721 | -0.228800 |
| 74 | 8  | 0 | 3.068406  | -4.335202 | -0.118833 |

---

**Table S19.** The theoretical Cartesian coordinates (in Å) for the structure **PtO-II** using the M06L/DZP method

Standard orientation:

| Center<br>Number | Atomic<br>Number | Atomic<br>Type | Coordinates (Angstroms) |           |           |
|------------------|------------------|----------------|-------------------------|-----------|-----------|
|                  |                  |                | X                       | Y         | Z         |
| 1                | 15               | 0              | 2.081526                | -0.210641 | -0.120862 |
| 2                | 15               | 0              | -1.628602               | 0.416733  | -0.013302 |
| 3                | 6                | 0              | 2.058856                | 0.772287  | 1.415156  |
| 4                | 6                | 0              | 2.713373                | 1.999835  | 1.574538  |
| 5                | 6                | 0              | 1.296707                | 0.259651  | 2.477452  |
| 6                | 6                | 0              | 2.591092                | 2.710772  | 2.770531  |
| 7                | 1                | 0              | 3.301438                | 2.412127  | 0.754699  |
| 8                | 6                | 0              | 1.181888                | 0.964759  | 3.672978  |
| 9                | 1                | 0              | 0.775505                | -0.691785 | 2.350154  |
| 10               | 6                | 0              | 1.822825                | 2.199941  | 3.818828  |
| 11               | 1                | 0              | 3.096453                | 3.667838  | 2.881102  |
| 12               | 1                | 0              | 0.583179                | 0.558627  | 4.485441  |
| 13               | 1                | 0              | 1.725937                | 2.758892  | 4.746597  |
| 14               | 6                | 0              | 2.901749                | 0.872428  | -1.332611 |
| 15               | 6                | 0              | 4.164477                | 0.604533  | -1.877928 |
| 16               | 6                | 0              | 2.196027                | 2.006422  | -1.766270 |
| 17               | 6                | 0              | 4.713162                | 1.463544  | -2.833109 |
| 18               | 1                | 0              | 4.720704                | -0.275969 | -1.559159 |
| 19               | 6                | 0              | 2.751681                | 2.867838  | -2.708369 |
| 20               | 1                | 0              | 1.203862                | 2.211843  | -1.362261 |
| 21               | 6                | 0              | 4.012794                | 2.597381  | -3.246909 |
| 22               | 1                | 0              | 5.692136                | 1.244065  | -3.252878 |
| 23               | 1                | 0              | 2.194595                | 3.745416  | -3.029468 |
| 24               | 1                | 0              | 4.444141                | 3.263453  | -3.990319 |
| 25               | 6                | 0              | 3.324814                | -1.492815 | 0.249427  |
| 26               | 6                | 0              | 4.440746                | -1.218379 | 1.054936  |
| 27               | 6                | 0              | 3.168388                | -2.773308 | -0.297560 |
| 28               | 6                | 0              | 5.386920                | -2.210212 | 1.306120  |
| 29               | 1                | 0              | 4.560900                | -0.226914 | 1.491683  |
| 30               | 6                | 0              | 4.121546                | -3.762853 | -0.050273 |
| 31               | 1                | 0              | 2.289510                | -2.999621 | -0.900945 |
| 32               | 6                | 0              | 5.229928                | -3.483509 | 0.750516  |
| 33               | 1                | 0              | 6.245846                | -1.991331 | 1.936045  |
| 34               | 1                | 0              | 3.988989                | -4.754747 | -0.474382 |
| 35               | 1                | 0              | 5.966881                | -4.257886 | 0.950246  |
| 36               | 6                | 0              | -1.148496               | 2.163892  | -0.226480 |

|    |    |   |           |           |           |
|----|----|---|-----------|-----------|-----------|
| 37 | 6  | 0 | -1.377075 | 2.802038  | -1.456618 |
| 38 | 6  | 0 | -0.435911 | 2.847914  | 0.770661  |
| 39 | 6  | 0 | -0.901267 | 4.092732  | -1.683986 |
| 40 | 1  | 0 | -1.927878 | 2.282578  | -2.239623 |
| 41 | 6  | 0 | 0.036654  | 4.139381  | 0.540602  |
| 42 | 1  | 0 | -0.244507 | 2.374241  | 1.734144  |
| 43 | 6  | 0 | -0.189931 | 4.765130  | -0.686998 |
| 44 | 1  | 0 | -1.087040 | 4.572835  | -2.641936 |
| 45 | 1  | 0 | 0.589107  | 4.651325  | 1.325556  |
| 46 | 1  | 0 | 0.182640  | 5.771161  | -0.865258 |
| 47 | 6  | 0 | -3.131363 | 0.293892  | -1.041316 |
| 48 | 6  | 0 | -4.348909 | 0.848949  | -0.624541 |
| 49 | 6  | 0 | -3.054686 | -0.336297 | -2.289745 |
| 50 | 6  | 0 | -5.471936 | 0.774410  | -1.445129 |
| 51 | 1  | 0 | -4.426899 | 1.324240  | 0.352266  |
| 52 | 6  | 0 | -4.178253 | -0.404722 | -3.113282 |
| 53 | 1  | 0 | -2.110946 | -0.784371 | -2.603467 |
| 54 | 6  | 0 | -5.388132 | 0.147651  | -2.690766 |
| 55 | 1  | 0 | -6.415833 | 1.194861  | -1.107397 |
| 56 | 1  | 0 | -4.110969 | -0.905216 | -4.075885 |
| 57 | 1  | 0 | -6.268247 | 0.080604  | -3.325678 |
| 58 | 6  | 0 | -2.226504 | 0.303366  | 1.704497  |
| 59 | 6  | 0 | -2.797830 | 1.390617  | 2.382909  |
| 60 | 6  | 0 | -2.159725 | -0.942511 | 2.343977  |
| 61 | 6  | 0 | -3.284470 | 1.234113  | 3.680456  |
| 62 | 1  | 0 | -2.852118 | 2.364975  | 1.897726  |
| 63 | 6  | 0 | -2.654434 | -1.099395 | 3.637638  |
| 64 | 1  | 0 | -1.715689 | -1.788087 | 1.816081  |
| 65 | 6  | 0 | -3.214838 | -0.010913 | 4.309465  |
| 66 | 1  | 0 | -3.721950 | 2.084570  | 4.198034  |
| 67 | 1  | 0 | -2.602195 | -2.072293 | 4.119637  |
| 68 | 1  | 0 | -3.598087 | -0.131660 | 5.319945  |
| 69 | 78 | 0 | -0.095455 | -1.160476 | -0.517113 |
| 70 | 6  | 0 | -1.205773 | -2.873285 | -0.805737 |
| 71 | 6  | 0 | -2.471524 | -3.330563 | -0.709076 |
| 72 | 6  | 0 | -3.645306 | -2.888060 | -0.399018 |
| 73 | 8  | 0 | -0.066446 | -3.334333 | -1.068152 |
| 74 | 8  | 0 | -4.782484 | -2.670413 | -0.136001 |

---

**Table S20.** The theoretical Cartesian coordinates (in Å) for the structure **PtS-I** using the M06L/DZP method

Standard orientation:

| Center<br>Number | Atomic<br>Number | Atomic<br>Type | Coordinates (Angstroms) |           |           |
|------------------|------------------|----------------|-------------------------|-----------|-----------|
|                  |                  |                | X                       | Y         | Z         |
| 1                | 15               | 0              | 1.692683                | 0.553888  | -0.021267 |
| 2                | 15               | 0              | -1.959852               | 0.081859  | -0.009722 |
| 3                | 6                | 0              | 2.372939                | 0.693309  | 1.664566  |
| 4                | 6                | 0              | 2.905433                | 1.882428  | 2.181658  |
| 5                | 6                | 0              | 2.386071                | -0.465061 | 2.458037  |
| 6                | 6                | 0              | 3.432072                | 1.915336  | 3.473009  |
| 7                | 1                | 0              | 2.901799                | 2.786246  | 1.573842  |
| 8                | 6                | 0              | 2.925180                | -0.433286 | 3.743049  |
| 9                | 1                | 0              | 1.969694                | -1.392045 | 2.058296  |
| 10               | 6                | 0              | 3.444235                | 0.758578  | 4.255565  |
| 11               | 1                | 0              | 3.837799                | 2.844583  | 3.865819  |
| 12               | 1                | 0              | 2.935267                | -1.338333 | 4.344921  |
| 13               | 1                | 0              | 3.857148                | 0.785482  | 5.261376  |
| 14               | 6                | 0              | 1.385837                | 2.277236  | -0.533631 |
| 15               | 6                | 0              | 1.801474                | 2.747584  | -1.788284 |
| 16               | 6                | 0              | 0.591320                | 3.110074  | 0.272245  |
| 17               | 6                | 0              | 1.425478                | 4.017235  | -2.228056 |
| 18               | 1                | 0              | 2.421352                | 2.117640  | -2.425059 |
| 19               | 6                | 0              | 0.215445                | 4.376295  | -0.170683 |
| 20               | 1                | 0              | 0.273721                | 2.768670  | 1.257951  |
| 21               | 6                | 0              | 0.626417                | 4.833134  | -1.425226 |
| 22               | 1                | 0              | 1.759353                | 4.368885  | -3.201714 |
| 23               | 1                | 0              | -0.399304               | 5.005711  | 0.469053  |
| 24               | 1                | 0              | 0.330005                | 5.820140  | -1.772151 |
| 25               | 6                | 0              | 3.127309                | 0.077909  | -1.042469 |
| 26               | 6                | 0              | 4.418430                | 0.553168  | -0.772655 |
| 27               | 6                | 0              | 2.919563                | -0.761840 | -2.143857 |
| 28               | 6                | 0              | 5.485331                | 0.188956  | -1.592476 |
| 29               | 1                | 0              | 4.588217                | 1.199125  | 0.088871  |
| 30               | 6                | 0              | 3.986188                | -1.117648 | -2.969669 |
| 31               | 1                | 0              | 1.918832                | -1.154288 | -2.335204 |
| 32               | 6                | 0              | 5.269497                | -0.643875 | -2.694209 |
| 33               | 1                | 0              | 6.486256                | 0.551659  | -1.370692 |
| 34               | 1                | 0              | 3.816601                | -1.779264 | -3.815272 |
| 35               | 1                | 0              | 6.104253                | -0.931859 | -3.328731 |
| 36               | 6                | 0              | -1.913957               | 1.206334  | 1.430249  |



|    |    |   |           |           |           |
|----|----|---|-----------|-----------|-----------|
| 37 | 6  | 0 | -2.587752 | 2.433335  | 1.465707  |
| 38 | 6  | 0 | -1.134456 | 0.825098  | 2.533541  |
| 39 | 6  | 0 | -2.473055 | 3.269704  | 2.576578  |
| 40 | 1  | 0 | -3.177447 | 2.756912  | 0.610257  |
| 41 | 6  | 0 | -1.022355 | 1.659422  | 3.646206  |
| 42 | 1  | 0 | -0.597646 | -0.125173 | 2.503137  |
| 43 | 6  | 0 | -1.687911 | 2.887521  | 3.667178  |
| 44 | 1  | 0 | -2.993065 | 4.225090  | 2.587331  |
| 45 | 1  | 0 | -0.404386 | 1.354125  | 4.487586  |
| 46 | 1  | 0 | -1.593427 | 3.544796  | 4.528322  |
| 47 | 6  | 0 | -2.348112 | 1.132894  | -1.447532 |
| 48 | 6  | 0 | -3.621962 | 1.698405  | -1.624124 |
| 49 | 6  | 0 | -1.352918 | 1.386397  | -2.398774 |
| 50 | 6  | 0 | -3.880605 | 2.526348  | -2.714455 |
| 51 | 1  | 0 | -4.416420 | 1.468278  | -0.913931 |
| 52 | 6  | 0 | -1.611397 | 2.216338  | -3.489949 |
| 53 | 1  | 0 | -0.377556 | 0.911958  | -2.282658 |
| 54 | 6  | 0 | -2.871795 | 2.794261  | -3.644535 |
| 55 | 1  | 0 | -4.870185 | 2.958137  | -2.842354 |
| 56 | 1  | 0 | -0.827242 | 2.406731  | -4.219343 |
| 57 | 1  | 0 | -3.075257 | 3.439479  | -4.496001 |
| 58 | 6  | 0 | -3.493247 | -0.862548 | 0.228236  |
| 59 | 6  | 0 | -4.052634 | -1.051673 | 1.498467  |
| 60 | 6  | 0 | -4.072518 | -1.501530 | -0.878370 |
| 61 | 6  | 0 | -5.190901 | -1.842741 | 1.653932  |
| 62 | 1  | 0 | -3.604668 | -0.570358 | 2.367155  |
| 63 | 6  | 0 | -5.215243 | -2.282055 | -0.721683 |
| 64 | 1  | 0 | -3.625255 | -1.385928 | -1.865337 |
| 65 | 6  | 0 | -5.778668 | -2.453256 | 0.544603  |
| 66 | 1  | 0 | -5.620936 | -1.978082 | 2.643300  |
| 67 | 1  | 0 | -5.658187 | -2.768074 | -1.587485 |
| 68 | 1  | 0 | -6.667937 | -3.067024 | 0.667046  |
| 69 | 78 | 0 | -0.017066 | -1.136652 | -0.144944 |
| 70 | 6  | 0 | 0.847194  | -3.080256 | -0.188301 |
| 71 | 6  | 0 | 2.084274  | -3.435884 | -0.157757 |
| 72 | 6  | 0 | -0.531303 | -3.112582 | -0.207690 |
| 73 | 16 | 0 | -1.798555 | -4.114281 | -0.246785 |
| 74 | 16 | 0 | 3.623176  | -3.775650 | -0.118125 |

---

**Table S21.** The theoretical Cartesian coordinates (in Å) for the structure **PtS-II** using the M06L/DZP method

Standard orientation:

| Center<br>Number | Atomic<br>Number | Atomic<br>Type | Coordinates (Angstroms) |           |           |
|------------------|------------------|----------------|-------------------------|-----------|-----------|
|                  |                  |                | X                       | Y         | Z         |
| 1                | 15               | 0              | 2.122736                | -0.292946 | -0.035691 |
| 2                | 15               | 0              | -1.426447               | 0.683914  | -0.033046 |
| 3                | 6                | 0              | 2.247452                | 0.694635  | 1.492079  |
| 4                | 6                | 0              | 3.087258                | 1.806519  | 1.625830  |
| 5                | 6                | 0              | 1.425009                | 0.322828  | 2.566844  |
| 6                | 6                | 0              | 3.093721                | 2.544732  | 2.810558  |
| 7                | 1                | 0              | 3.713719                | 2.116019  | 0.790275  |
| 8                | 6                | 0              | 1.434026                | 1.058204  | 3.751609  |
| 9                | 1                | 0              | 0.757109                | -0.534048 | 2.456143  |
| 10               | 6                | 0              | 2.265737                | 2.175257  | 3.873242  |
| 11               | 1                | 0              | 3.741376                | 3.414014  | 2.900624  |
| 12               | 1                | 0              | 0.781396                | 0.766793  | 4.571518  |
| 13               | 1                | 0              | 2.265574                | 2.757458  | 4.791497  |
| 14               | 6                | 0              | 2.855358                | 0.741017  | -1.345126 |
| 15               | 6                | 0              | 4.241126                | 0.945109  | -1.442504 |
| 16               | 6                | 0              | 2.007756                | 1.337759  | -2.286378 |
| 17               | 6                | 0              | 4.763898                | 1.751799  | -2.451547 |
| 18               | 1                | 0              | 4.910027                | 0.454660  | -0.734422 |
| 19               | 6                | 0              | 2.531883                | 2.147908  | -3.294095 |
| 20               | 1                | 0              | 0.934483                | 1.151171  | -2.231132 |
| 21               | 6                | 0              | 3.908679                | 2.359185  | -3.375833 |
| 22               | 1                | 0              | 5.838626                | 1.901592  | -2.521777 |
| 23               | 1                | 0              | 1.863012                | 2.605584  | -4.019552 |
| 24               | 1                | 0              | 4.318246                | 2.985193  | -4.165306 |
| 25               | 6                | 0              | 3.396925                | -1.577590 | 0.206514  |
| 26               | 6                | 0              | 4.251858                | -1.590062 | 1.315838  |
| 27               | 6                | 0              | 3.525212                | -2.580782 | -0.767642 |
| 28               | 6                | 0              | 5.223136                | -2.584026 | 1.447340  |
| 29               | 1                | 0              | 4.160386                | -0.822819 | 2.082878  |
| 30               | 6                | 0              | 4.502551                | -3.565093 | -0.639587 |
| 31               | 1                | 0              | 2.852585                | -2.588150 | -1.625995 |
| 32               | 6                | 0              | 5.353943                | -3.570023 | 0.469527  |
| 33               | 1                | 0              | 5.877883                | -2.585079 | 2.315442  |
| 34               | 1                | 0              | 4.594487                | -4.334813 | -1.401712 |
| 35               | 1                | 0              | 6.110314                | -4.344203 | 0.572270  |
| 36               | 6                | 0              | -0.764545               | 2.340726  | -0.411639 |

|    |    |   |           |           |           |
|----|----|---|-----------|-----------|-----------|
| 37 | 6  | 0 | -1.023390 | 2.953692  | -1.647768 |
| 38 | 6  | 0 | 0.121572  | 2.963765  | 0.481027  |
| 39 | 6  | 0 | -0.397024 | 4.152882  | -1.986680 |
| 40 | 1  | 0 | -1.717733 | 2.490670  | -2.347820 |
| 41 | 6  | 0 | 0.746264  | 4.161257  | 0.139101  |
| 42 | 1  | 0 | 0.312805  | 2.516975  | 1.455899  |
| 43 | 6  | 0 | 0.496464  | 4.755976  | -1.099314 |
| 44 | 1  | 0 | -0.608831 | 4.616628  | -2.947499 |
| 45 | 1  | 0 | 1.428660  | 4.629098  | 0.845664  |
| 46 | 1  | 0 | 0.987960  | 5.688193  | -1.367502 |
| 47 | 6  | 0 | -2.921981 | 0.611057  | -1.071385 |
| 48 | 6  | 0 | -4.069265 | 1.341477  | -0.734910 |
| 49 | 6  | 0 | -2.898696 | -0.128692 | -2.259798 |
| 50 | 6  | 0 | -5.177840 | 1.333496  | -1.578742 |
| 51 | 1  | 0 | -4.099987 | 1.907761  | 0.195550  |
| 52 | 6  | 0 | -4.008388 | -0.134519 | -3.104353 |
| 53 | 1  | 0 | -2.012967 | -0.717670 | -2.503110 |
| 54 | 6  | 0 | -5.147958 | 0.597384  | -2.765318 |
| 55 | 1  | 0 | -6.068319 | 1.893353  | -1.304753 |
| 56 | 1  | 0 | -3.988511 | -0.723888 | -4.017370 |
| 57 | 1  | 0 | -6.018365 | 0.581554  | -3.416605 |
| 58 | 6  | 0 | -2.050187 | 0.809595  | 1.675189  |
| 59 | 6  | 0 | -2.393901 | 2.032917  | 2.268915  |
| 60 | 6  | 0 | -2.249882 | -0.380025 | 2.392237  |
| 61 | 6  | 0 | -2.917110 | 2.065798  | 3.561424  |
| 62 | 1  | 0 | -2.248739 | 2.962891  | 1.720160  |
| 63 | 6  | 0 | -2.786786 | -0.345163 | 3.677491  |
| 64 | 1  | 0 | -1.990952 | -1.334178 | 1.931304  |
| 65 | 6  | 0 | -3.116813 | 0.877491  | 4.267036  |
| 66 | 1  | 0 | -3.176339 | 3.020341  | 4.013537  |
| 67 | 1  | 0 | -2.948315 | -1.275019 | 4.216949  |
| 68 | 1  | 0 | -3.530643 | 0.904160  | 5.272449  |
| 69 | 16 | 0 | -0.057731 | -3.546756 | -0.658220 |
| 70 | 78 | 0 | -0.069986 | -1.150146 | -0.331585 |
| 71 | 6  | 0 | -1.464050 | -2.646987 | -0.441507 |
| 72 | 6  | 0 | -2.779231 | -2.771468 | -0.304486 |
| 73 | 6  | 0 | -4.010345 | -2.518478 | -0.104545 |
| 74 | 16 | 0 | -5.557206 | -2.277913 | 0.152921  |

---

**Table S22.** The theoretical Cartesian coordinates (in Å) for the structure **PtSe-I** using the M06L/DZP method

Standard orientation:

| Center<br>Number | Atomic<br>Number | Atomic<br>Type | Coordinates (Angstroms) |           |           |
|------------------|------------------|----------------|-------------------------|-----------|-----------|
|                  |                  |                | X                       | Y         | Z         |
| 1                | 15               | 0              | 1.529873                | 0.978820  | -0.038134 |
| 2                | 15               | 0              | -2.062615               | 0.253442  | 0.019869  |
| 3                | 6                | 0              | 2.265660                | 1.137081  | 1.621280  |
| 4                | 6                | 0              | 2.768800                | 2.345446  | 2.123694  |
| 5                | 6                | 0              | 2.357022                | -0.023268 | 2.406071  |
| 6                | 6                | 0              | 3.347281                | 2.393805  | 3.392295  |
| 7                | 1                | 0              | 2.700497                | 3.251537  | 1.522356  |
| 8                | 6                | 0              | 2.947717                | 0.024621  | 3.667781  |
| 9                | 1                | 0              | 1.964200                | -0.965601 | 2.017894  |
| 10               | 6                | 0              | 3.439435                | 1.234021  | 4.165364  |
| 11               | 1                | 0              | 3.730389                | 3.336768  | 3.774802  |
| 12               | 1                | 0              | 3.019984                | -0.882651 | 4.262269  |
| 13               | 1                | 0              | 3.893590                | 1.272806  | 5.152882  |
| 14               | 6                | 0              | 1.092076                | 2.687550  | -0.504984 |
| 15               | 6                | 0              | 1.456949                | 3.208838  | -1.754784 |
| 16               | 6                | 0              | 0.270761                | 3.457982  | 0.335506  |
| 17               | 6                | 0              | 1.009376                | 4.467927  | -2.156281 |
| 18               | 1                | 0              | 2.096093                | 2.628742  | -2.419372 |
| 19               | 6                | 0              | -0.174453               | 4.715833  | -0.068071 |
| 20               | 1                | 0              | -0.010643               | 3.076982  | 1.317817  |
| 21               | 6                | 0              | 0.189404                | 5.224237  | -1.317587 |
| 22               | 1                | 0              | 1.305634                | 4.858665  | -3.127291 |
| 23               | 1                | 0              | -0.807337               | 5.296888  | 0.599559  |
| 24               | 1                | 0              | -0.160188               | 6.204706  | -1.632108 |
| 25               | 6                | 0              | 2.943600                | 0.615424  | -1.131690 |
| 26               | 6                | 0              | 4.218238                | 1.153515  | -0.908756 |
| 27               | 6                | 0              | 2.728125                | -0.204440 | -2.246562 |
| 28               | 6                | 0              | 5.262053                | 0.870008  | -1.788699 |
| 29               | 1                | 0              | 4.395561                | 1.784704  | -0.037913 |
| 30               | 6                | 0              | 3.769928                | -0.478253 | -3.132864 |
| 31               | 1                | 0              | 1.740839                | -0.644385 | -2.401570 |
| 32               | 6                | 0              | 5.038052                | 0.057781  | -2.903766 |
| 33               | 1                | 0              | 6.251385                | 1.281832  | -1.604082 |
| 34               | 1                | 0              | 3.594483                | -1.123234 | -3.990016 |
| 35               | 1                | 0              | 5.854851                | -0.164813 | -3.586384 |
| 36               | 6                | 0              | -2.064790               | 1.329369  | 1.499117  |

|    |    |   |           |           |           |
|----|----|---|-----------|-----------|-----------|
| 37 | 6  | 0 | -2.845573 | 2.487323  | 1.600546  |
| 38 | 6  | 0 | -1.223935 | 0.979325  | 2.567013  |
| 39 | 6  | 0 | -2.777723 | 3.286758  | 2.741830  |
| 40 | 1  | 0 | -3.487728 | 2.786119  | 0.774609  |
| 41 | 6  | 0 | -1.159652 | 1.775533  | 3.711245  |
| 42 | 1  | 0 | -0.602681 | 0.085131  | 2.482456  |
| 43 | 6  | 0 | -1.934058 | 2.934621  | 3.798491  |
| 44 | 1  | 0 | -3.381587 | 4.189112  | 2.803595  |
| 45 | 1  | 0 | -0.495249 | 1.494236  | 4.525478  |
| 46 | 1  | 0 | -1.878825 | 3.562241  | 4.684635  |
| 47 | 6  | 0 | -2.518115 | 1.318782  | -1.387610 |
| 48 | 6  | 0 | -3.806113 | 1.863588  | -1.526189 |
| 49 | 6  | 0 | -1.557143 | 1.591483  | -2.367974 |
| 50 | 6  | 0 | -4.109095 | 2.691773  | -2.605078 |
| 51 | 1  | 0 | -4.579136 | 1.615506  | -0.798718 |
| 52 | 6  | 0 | -1.860643 | 2.419075  | -3.449188 |
| 53 | 1  | 0 | -0.570918 | 1.132913  | -2.283235 |
| 54 | 6  | 0 | -3.133290 | 2.978458  | -3.564000 |
| 55 | 1  | 0 | -5.109061 | 3.107585  | -2.702010 |
| 56 | 1  | 0 | -1.101042 | 2.623876  | -4.200268 |
| 57 | 1  | 0 | -3.372427 | 3.623051  | -4.406514 |
| 58 | 6  | 0 | -3.528706 | -0.792236 | 0.250579  |
| 59 | 6  | 0 | -3.931564 | -1.182855 | 1.534761  |
| 60 | 6  | 0 | -4.188567 | -1.327874 | -0.865453 |
| 61 | 6  | 0 | -5.000280 | -2.062287 | 1.699979  |
| 62 | 1  | 0 | -3.412871 | -0.790766 | 2.409286  |
| 63 | 6  | 0 | -5.264651 | -2.197074 | -0.696687 |
| 64 | 1  | 0 | -3.862473 | -1.059876 | -1.869974 |
| 65 | 6  | 0 | -5.675698 | -2.564447 | 0.585723  |
| 66 | 1  | 0 | -5.306769 | -2.354086 | 2.701607  |
| 67 | 1  | 0 | -5.773977 | -2.597957 | -1.569797 |
| 68 | 1  | 0 | -6.512167 | -3.246879 | 0.716171  |
| 69 | 78 | 0 | -0.046205 | -0.826368 | -0.143970 |
| 70 | 6  | 0 | 0.943406  | -2.748607 | -0.166543 |
| 71 | 6  | 0 | 2.219821  | -2.872992 | -0.083825 |
| 72 | 6  | 0 | -0.423888 | -2.834824 | -0.215308 |
| 73 | 34 | 0 | -1.730265 | -4.019029 | -0.295605 |
| 74 | 34 | 0 | 3.934208  | -2.956747 | 0.037700  |

---

**Table S23.** The theoretical Cartesian coordinates (in Å) for the structure **PtSe-II** using the M06L/DZP method

Standard orientation:

| Center<br>Number | Atomic<br>Number | Atomic<br>Type | Coordinates (Angstroms) |           |           |
|------------------|------------------|----------------|-------------------------|-----------|-----------|
|                  |                  |                | X                       | Y         | Z         |
| 1                | 15               | 0              | -2.196451               | -0.549917 | -0.043303 |
| 2                | 15               | 0              | 0.861064                | 1.378568  | 0.003353  |
| 3                | 6                | 0              | -3.055348               | -1.851361 | -0.996158 |
| 4                | 6                | 0              | -4.388136               | -2.188100 | -0.718811 |
| 5                | 6                | 0              | -2.391534               | -2.492583 | -2.050018 |
| 6                | 6                | 0              | -5.041711               | -3.158321 | -1.475296 |
| 7                | 1                | 0              | -4.912840               | -1.695990 | 0.099401  |
| 8                | 6                | 0              | -3.049291               | -3.460301 | -2.811674 |
| 9                | 1                | 0              | -1.351085               | -2.242890 | -2.260299 |
| 10               | 6                | 0              | -4.372574               | -3.796887 | -2.523468 |
| 11               | 1                | 0              | -6.071941               | -3.419264 | -1.245925 |
| 12               | 1                | 0              | -2.522664               | -3.956444 | -3.622831 |
| 13               | 1                | 0              | -4.881112               | -4.558760 | -3.109574 |
| 14               | 6                | 0              | -3.027202               | 0.964590  | -0.633610 |
| 15               | 6                | 0              | -3.029362               | 2.127132  | 0.154230  |
| 16               | 6                | 0              | -3.555816               | 1.028692  | -1.932248 |
| 17               | 6                | 0              | -3.541426               | 3.322421  | -0.348141 |
| 18               | 1                | 0              | -2.646032               | 2.097007  | 1.174263  |
| 19               | 6                | 0              | -4.070365               | 2.225336  | -2.430573 |
| 20               | 1                | 0              | -3.564725               | 0.137347  | -2.558812 |
| 21               | 6                | 0              | -4.060907               | 3.377969  | -1.642621 |
| 22               | 1                | 0              | -3.537654               | 4.210789  | 0.279700  |
| 23               | 1                | 0              | -4.477966               | 2.256061  | -3.438577 |
| 24               | 1                | 0              | -4.458761               | 4.311202  | -2.033366 |
| 25               | 6                | 0              | -2.819142               | -0.777969 | 1.659124  |
| 26               | 6                | 0              | -4.012764               | -0.208247 | 2.126287  |
| 27               | 6                | 0              | -2.077285               | -1.603251 | 2.518166  |
| 28               | 6                | 0              | -4.448615               | -0.450636 | 3.429283  |
| 29               | 1                | 0              | -4.602644               | 0.431998  | 1.471647  |
| 30               | 6                | 0              | -2.518740               | -1.851661 | 3.816845  |
| 31               | 1                | 0              | -1.147817               | -2.050197 | 2.159813  |
| 32               | 6                | 0              | -3.703451               | -1.272309 | 4.277672  |
| 33               | 1                | 0              | -5.375044               | -0.001101 | 3.778924  |
| 34               | 1                | 0              | -1.934425               | -2.495737 | 4.469132  |
| 35               | 1                | 0              | -4.045959               | -1.461687 | 5.292372  |
| 36               | 6                | 0              | 0.545717                | 2.364019  | -1.496208 |

|    |    |   |           |           |           |
|----|----|---|-----------|-----------|-----------|
| 37 | 6  | 0 | 1.125507  | 3.630625  | -1.680073 |
| 38 | 6  | 0 | -0.277188 | 1.839942  | -2.500158 |
| 39 | 6  | 0 | 0.857055  | 4.367297  | -2.831633 |
| 40 | 1  | 0 | 1.809299  | 4.025446  | -0.928680 |
| 41 | 6  | 0 | -0.544323 | 2.577074  | -3.653673 |
| 42 | 1  | 0 | -0.689221 | 0.836933  | -2.378205 |
| 43 | 6  | 0 | 0.015132  | 3.844455  | -3.817672 |
| 44 | 1  | 0 | 1.312200  | 5.345556  | -2.964873 |
| 45 | 1  | 0 | -1.185608 | 2.156813  | -4.425365 |
| 46 | 1  | 0 | -0.189515 | 4.419117  | -4.717952 |
| 47 | 6  | 0 | 0.019088  | 2.238860  | 1.375789  |
| 48 | 6  | 0 | -0.290802 | 3.604673  | 1.363178  |
| 49 | 6  | 0 | -0.356163 | 1.464433  | 2.483669  |
| 50 | 6  | 0 | -0.986055 | 4.177624  | 2.428561  |
| 51 | 1  | 0 | -0.025374 | 4.217367  | 0.503750  |
| 52 | 6  | 0 | -1.053724 | 2.035518  | 3.547969  |
| 53 | 1  | 0 | -0.116998 | 0.399681  | 2.491657  |
| 54 | 6  | 0 | -1.376912 | 3.394343  | 3.518008  |
| 55 | 1  | 0 | -1.234152 | 5.236237  | 2.402221  |
| 56 | 1  | 0 | -1.355683 | 1.414957  | 4.388636  |
| 57 | 1  | 0 | -1.931363 | 3.842115  | 4.339353  |
| 58 | 6  | 0 | 2.620238  | 1.678549  | 0.329917  |
| 59 | 6  | 0 | 3.536645  | 1.500389  | -0.718766 |
| 60 | 6  | 0 | 3.093131  | 1.992370  | 1.609991  |
| 61 | 6  | 0 | 4.899750  | 1.670396  | -0.496149 |
| 62 | 1  | 0 | 3.179107  | 1.223126  | -1.710580 |
| 63 | 6  | 0 | 4.462111  | 2.152765  | 1.830728  |
| 64 | 1  | 0 | 2.394438  | 2.121158  | 2.435321  |
| 65 | 6  | 0 | 5.365825  | 1.995534  | 0.780145  |
| 66 | 1  | 0 | 5.604244  | 1.513354  | -1.308463 |
| 67 | 1  | 0 | 4.820086  | 2.398842  | 2.827691  |
| 68 | 1  | 0 | 6.432923  | 2.107823  | 0.954692  |
| 69 | 78 | 0 | 0.182707  | -0.814046 | -0.115961 |
| 70 | 6  | 0 | 1.905615  | -1.907478 | -0.098788 |
| 71 | 6  | 0 | 3.223873  | -1.787702 | -0.093116 |
| 72 | 6  | 0 | 4.492075  | -1.723334 | -0.082855 |
| 73 | 34 | 0 | 6.221839  | -1.666488 | -0.074189 |
| 74 | 34 | 0 | 0.654879  | -3.275400 | -0.103103 |

---

**Complete Gaussian 09 reference (Reference 45)**

Gaussian 09, Revision B.01, M. J. Frisch, G. W. Trucks, H. B. Schlegel, G. E. Scuseria, M. A. Robb, J. R. Cheeseman, G. Scalmani, V. Barone, B. Mennucci, G. A. Petersson, H. Nakatsuji, M. Caricato, X. Li, H. P. Hratchian, A. F. Izmaylov, J. Bloino, G. Zheng, J. L. Sonnenberg, M. Hada, M. Ehara, K. Toyota, R. Fukuda, J. Hasegawa, M. Ishida, T. Nakajima, Y. Honda, O. Kitao, H. Nakai, T. Vreven, J. A. Montgomery, Jr., J. E. Peralta, F. Ogliaro, M. Bearpark, J. J. Heyd, E. Brothers, K. N. Kudin, V. N. Staroverov, T. Keith, R. Kobayashi, J. Normand, K. Raghavachari, A. Rendell, J. C. Burant, S. S. Iyengar, J. Tomasi, M. Cossi, N. Rega, J. M. Millam, M. Klene, J. E. Knox, J. B. Cross, V. Bakken, C. Adamo, J. Jaramillo, R. Gomperts, R. E. Stratmann, O. Yazyev, A. J. Austin, R. Cammi, C. Pomelli, J. W. Ochterski, R. L. Martin, K. Morokuma, V. G. Zakrzewski, G. A. Voth, P. Salvador, J. J. Dannenberg, S. Dapprich, A. D. Daniels, O. Farkas, J. B. Foresman, J. V. Ortiz, J. Cioslowski and D. J. Fox, Gaussian, Inc., Wallingford CT, 2010.
